# Supplementary material for: Synthesis and enhanced DNA cleavage activities of bis-tacnorthoamide derivatives
Source: Royal Society of Chemistry journal article supplement (doi:10.1039/c2ob25743b), 2012-01-01
Supplement: c2ob25743b.pdf [file c2ob25743b.pdf]

## Supplementary Information

---

# Synthesis and Enhanced DNA Cleavage Activities of Bis-tacnorthoamide Derivatives

Li Wei,<sup>a</sup> Ying Shao,<sup>\*b</sup> Mi Zhou,<sup>b</sup> Hong-Wen Hu,<sup>a</sup> Guo-Yuan Lu<sup>\*a</sup>

<sup>a</sup>Department of Chemistry, State Key Laboratory of Coordination Chemistry, Nanjing University, Nanjing 210093, Jiangsu, P. R. China

<sup>b</sup>Key Laboratory of Fine Petrochemical Engineering, Changzhou University, Changzhou 213164, Jiangsu, P. R. China

### Table of content

|     |                                                                                    |          |
|-----|------------------------------------------------------------------------------------|----------|
| 1.  | NMR and ESI–MS spectra                                                             | p2 ~ 9   |
| 2.  | Fluorescence spectroscopy (Figure S1)                                              | p10 ~ 11 |
| 3.  | Agarose gel of pH dependence (Figure S2)                                           | p12      |
| 4.  | Agarose gel of DNA cleavage by <b>3</b> (Figure S3 and Table S1)                   | p12      |
| 5.  | Agarose gel of Ionic strength dependence (Figure S4)                               | p13      |
| 6.  | Agarose gel of Concentration dependence (Figure S5 and S6)                         | p13~14   |
| 7.  | Kinetic data (Table S2)                                                            | p15~31   |
| 8.  | DNA cleavage in the presence of Radical scavengers<br>(Figure S7 and Table S3)     | p32      |
| 9.  | DNA cleavage in the presence of Nucleosides monophosphates<br>or BDNPP (Figure S8) | p32      |
| 10. | ESI-MS analysis of ApA cleavage in the presence of <b>1</b><br>(Figure S9)         | p33~34   |
| 11. | ESI-MS analysis of BDNPP in the presence of <b>1</b><br>(Figure S10)               | p35~36   |
| 12. | DNA cleavage in the presence of EDTA<br>(Figure S11 and Table S4)                  | p37      |

## Supplementary Information

### NMR and ESI-MS spectra

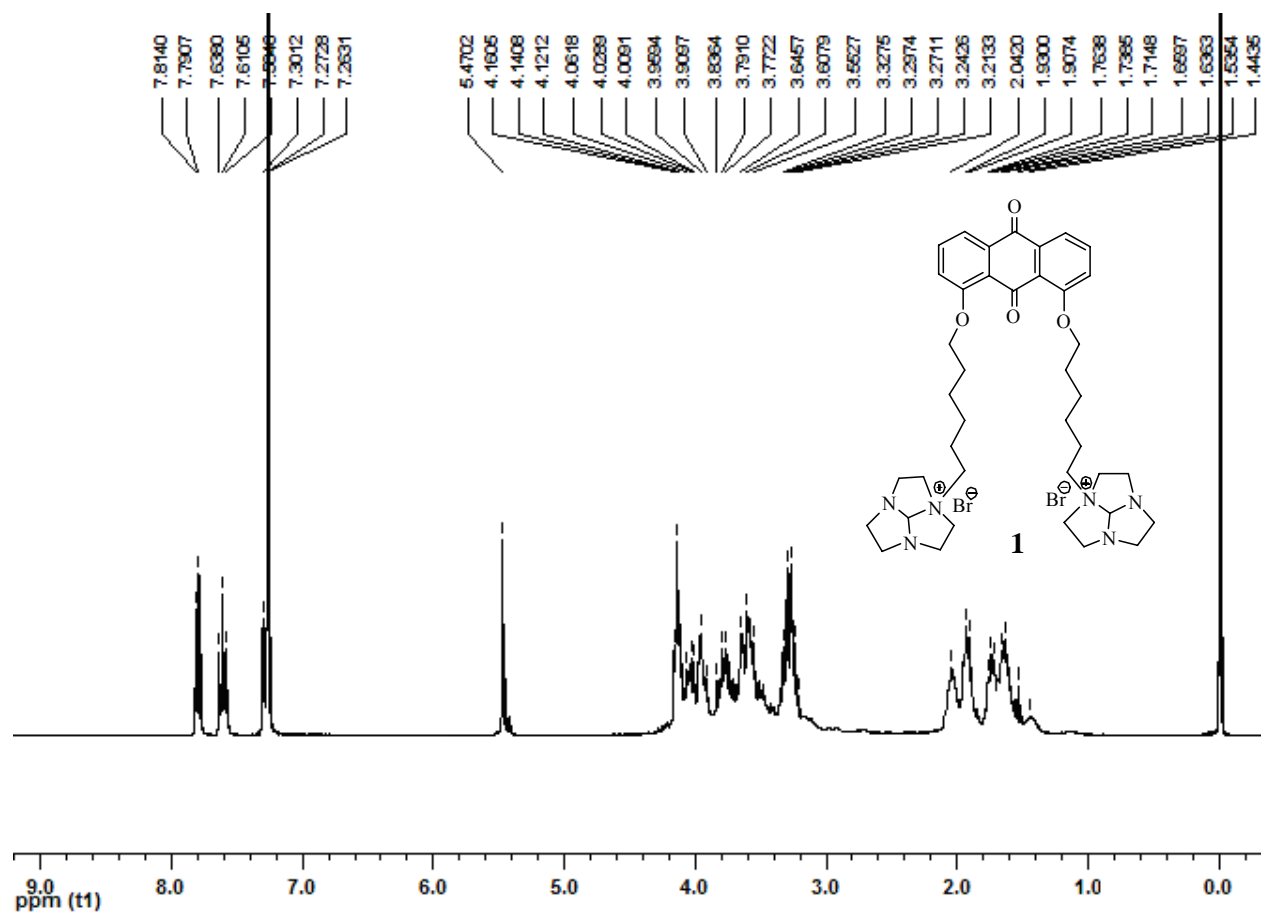

$^1\text{H}$  NMR (300 MHz,  $\text{CDCl}_3$ ) spectrum of **1**.

### Supplementary Information

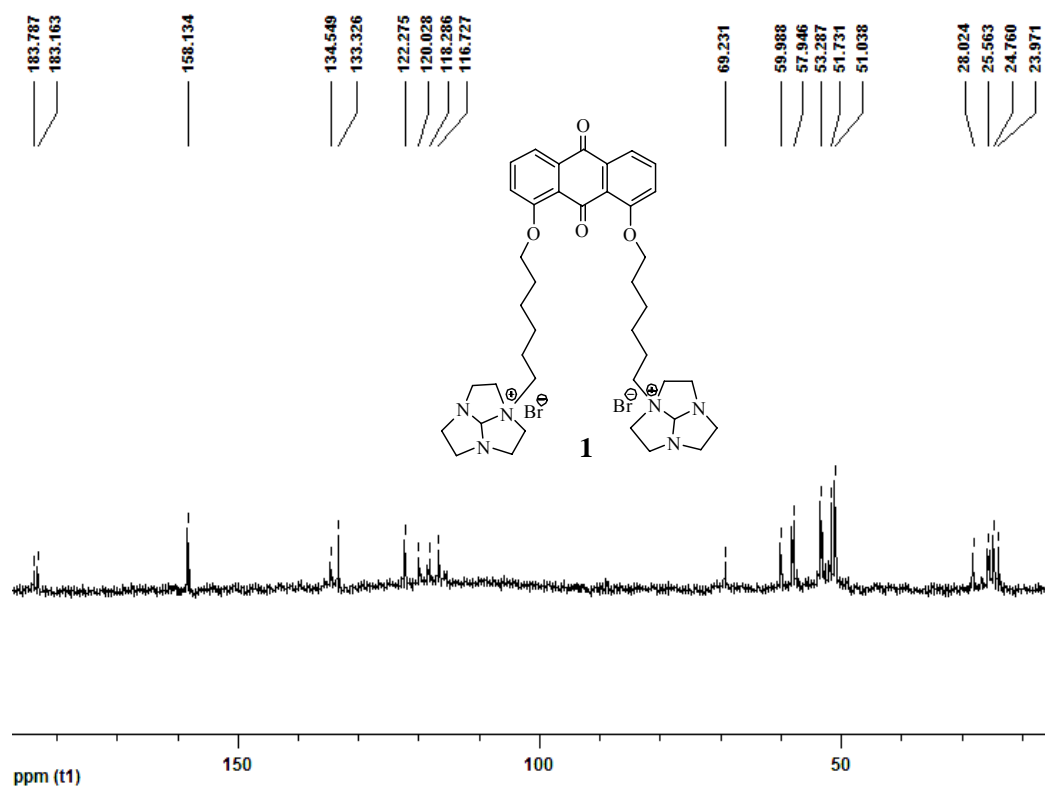

$^{13}\text{C}$  NMR (300 MHz,  $\text{D}_2\text{O}$ ) spectrum of **1**.

T: ITMS + p ESI Full ms [100.00-1000.00]

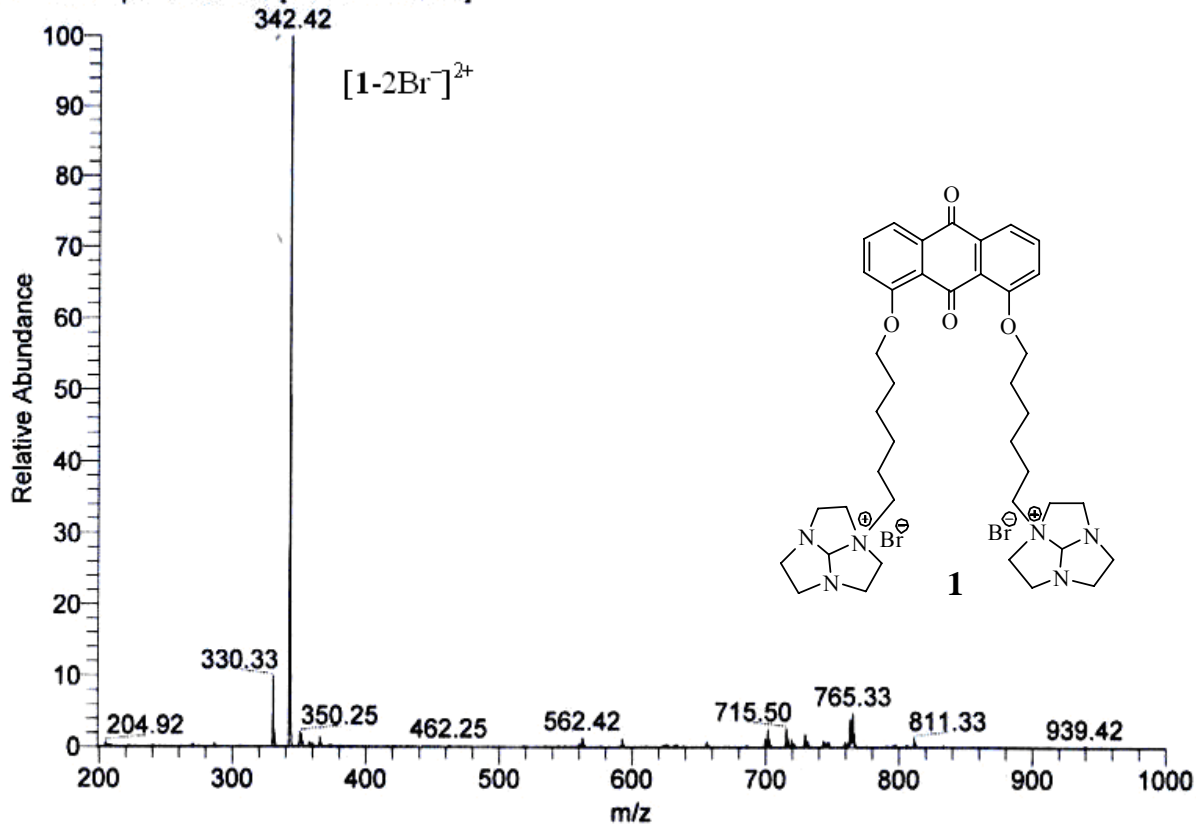

ESI-MS spectrum of **1**.

## Supplementary Information

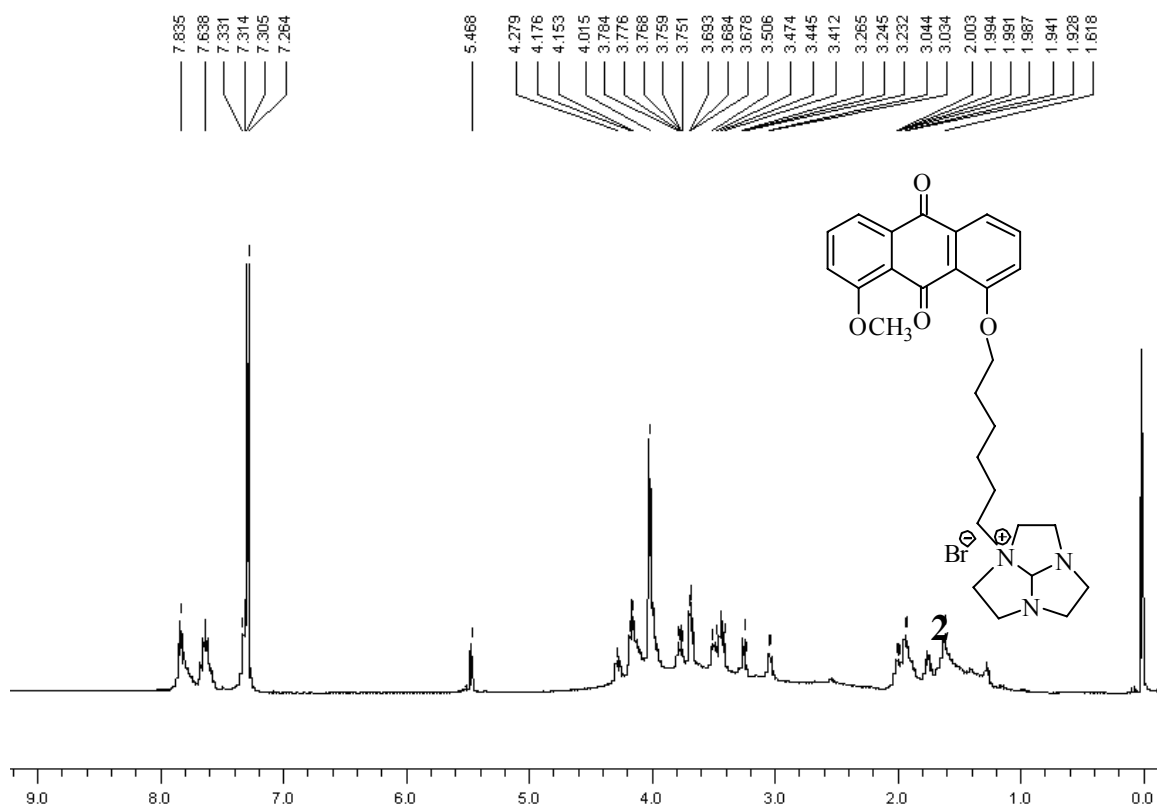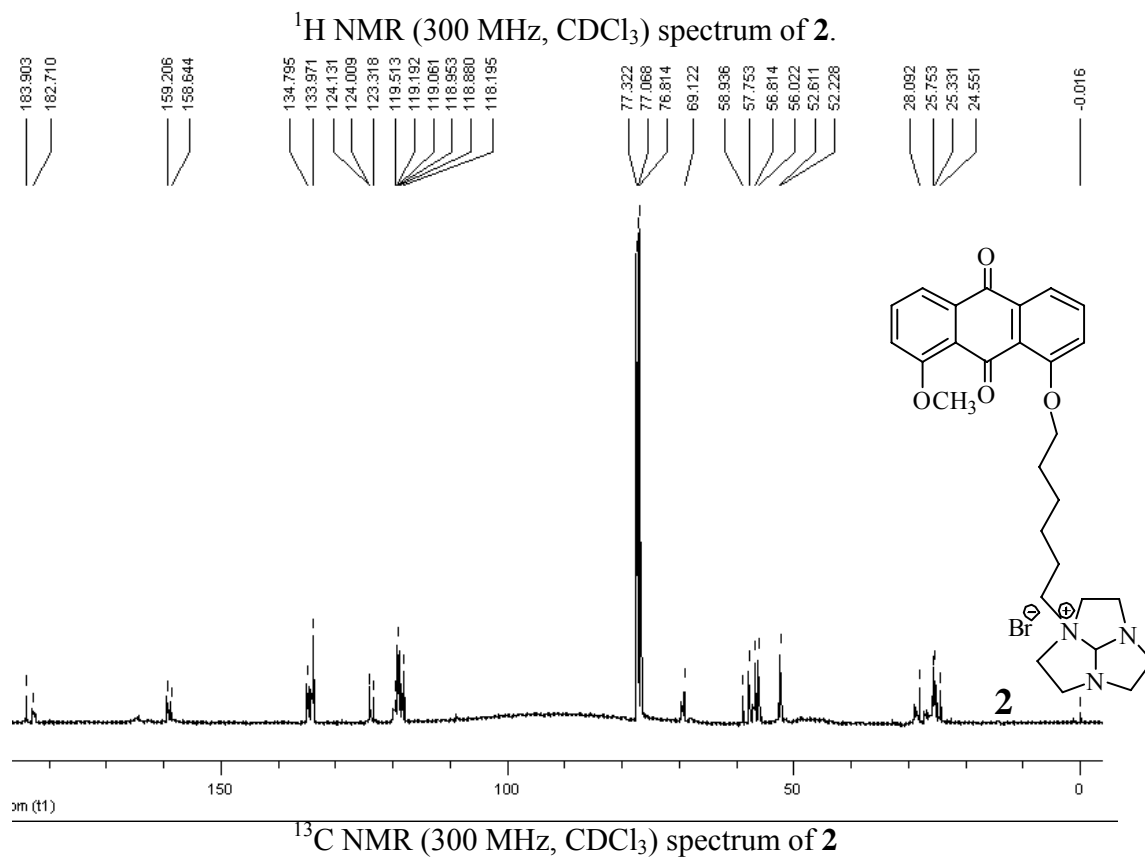

## Supplementary Information

2402\_101213105719 #22-55 RT: 0.07-0.16 AV: 34 NL: 5.50E3  
T: ITMS + p ESI Full ms [120.00-1000.00]

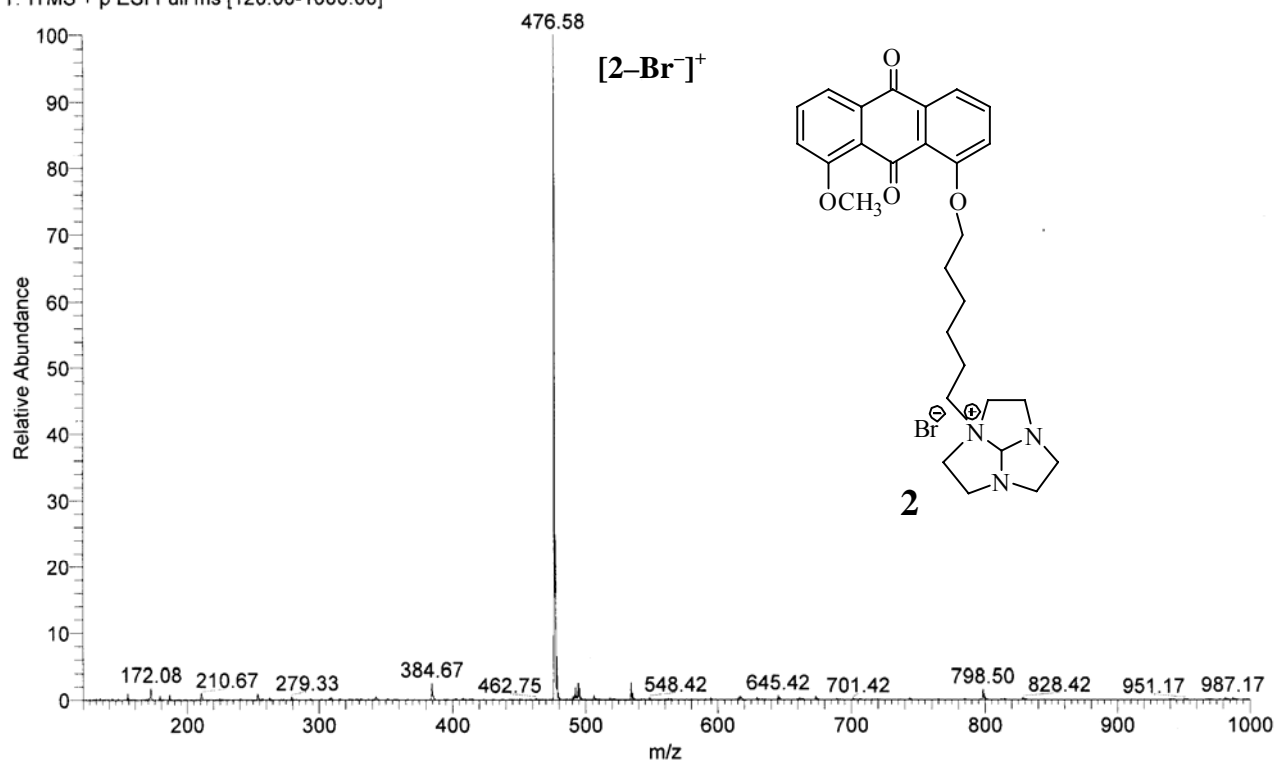

ESI-MS spectrum of **2**.

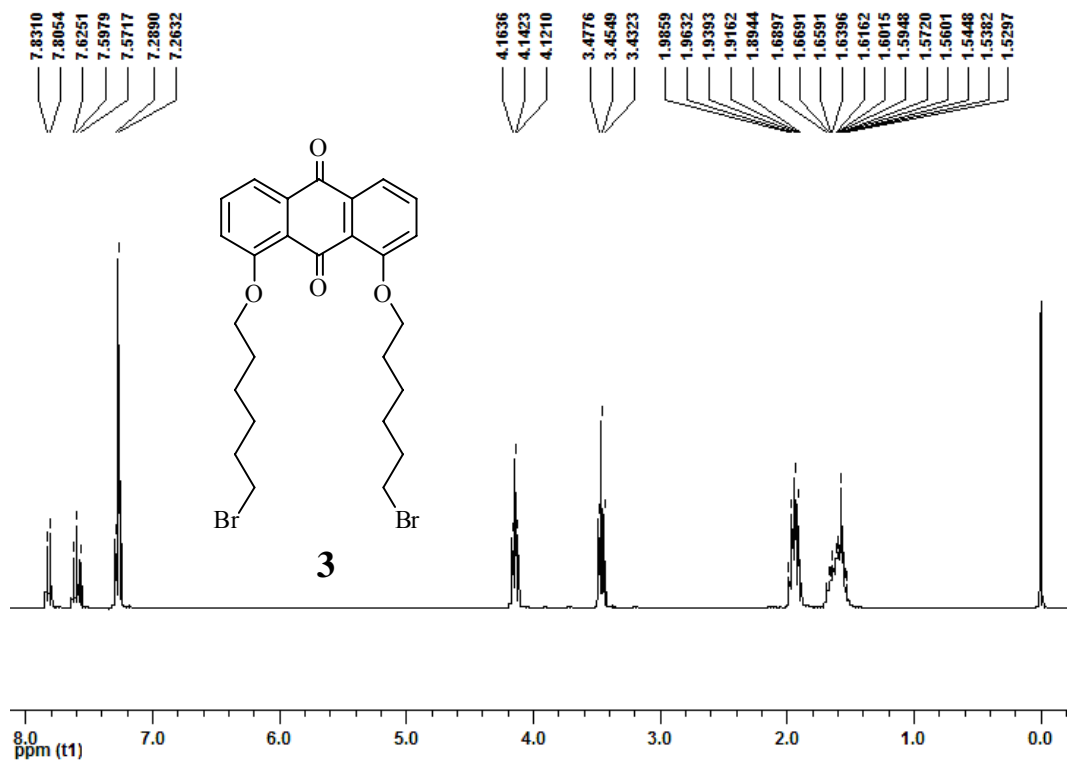

<sup>1</sup>H NMR (300 MHz, CDCl<sub>3</sub>) spectrum of **3**.

### Supplementary Information

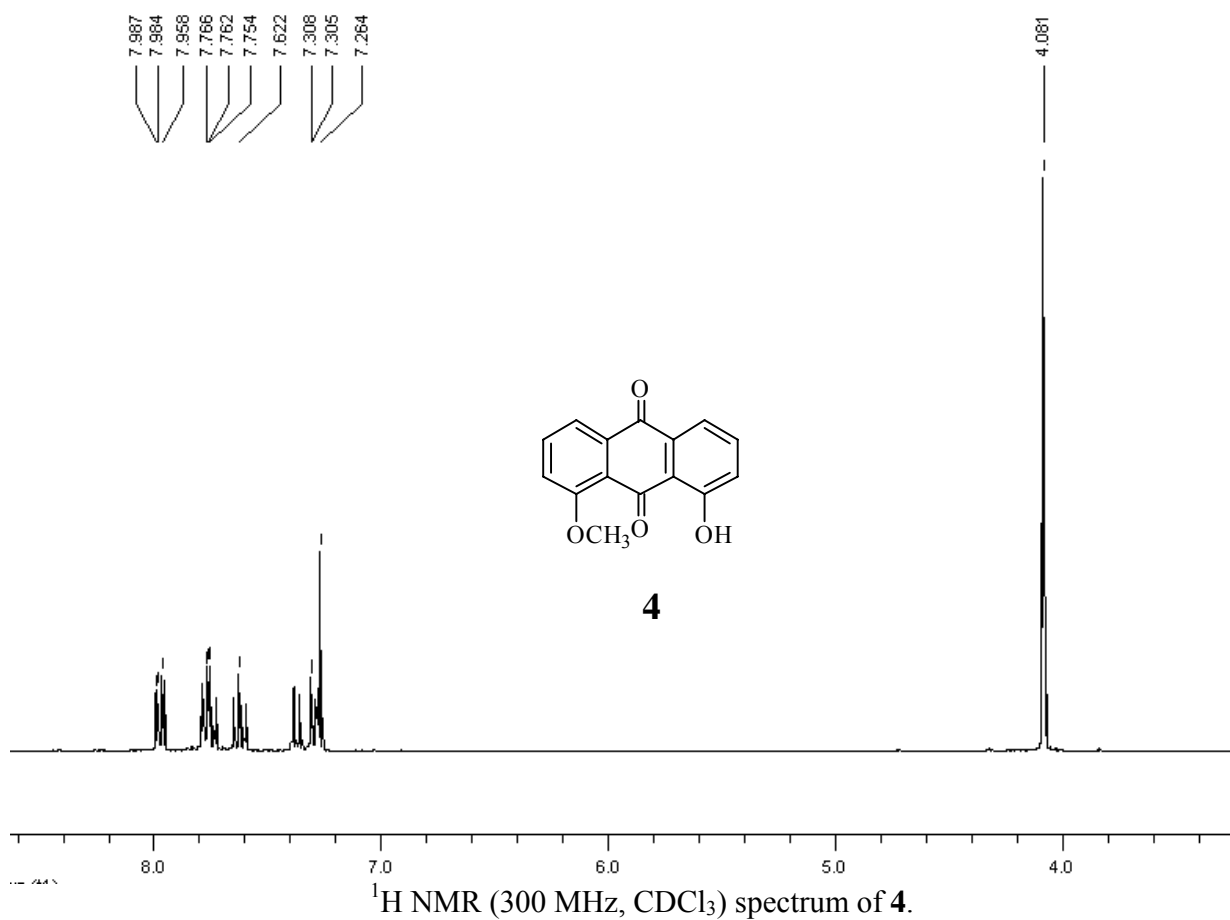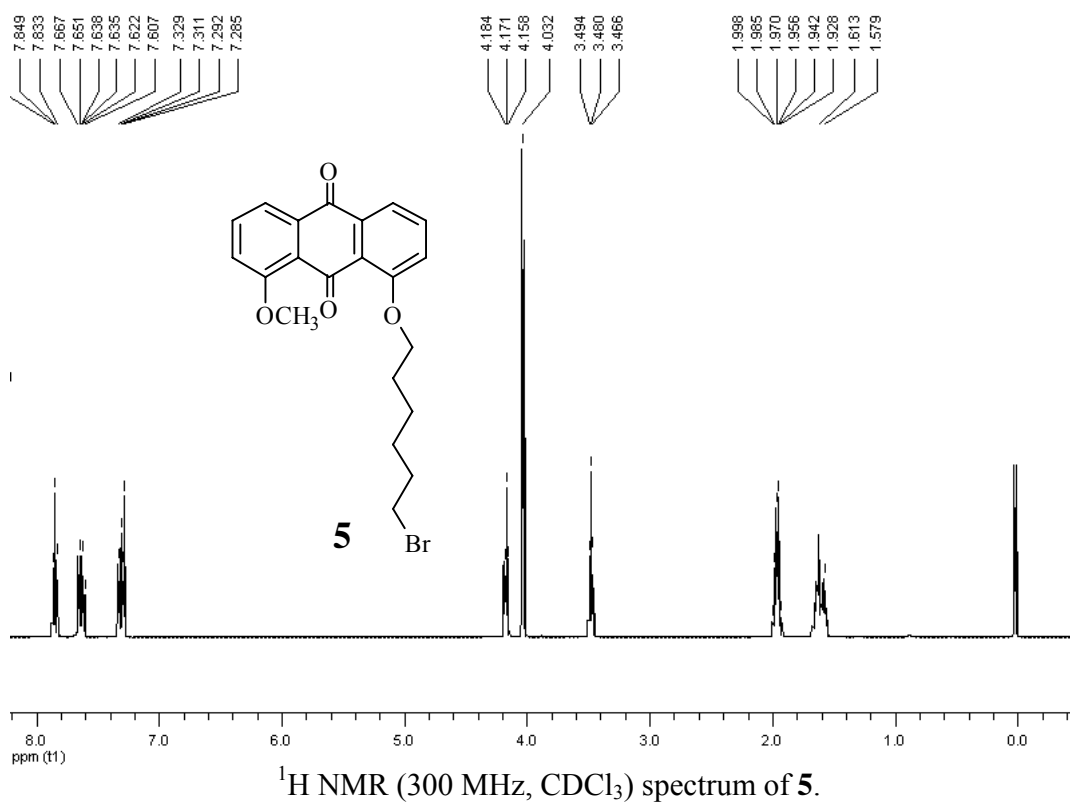

## Supplementary Information

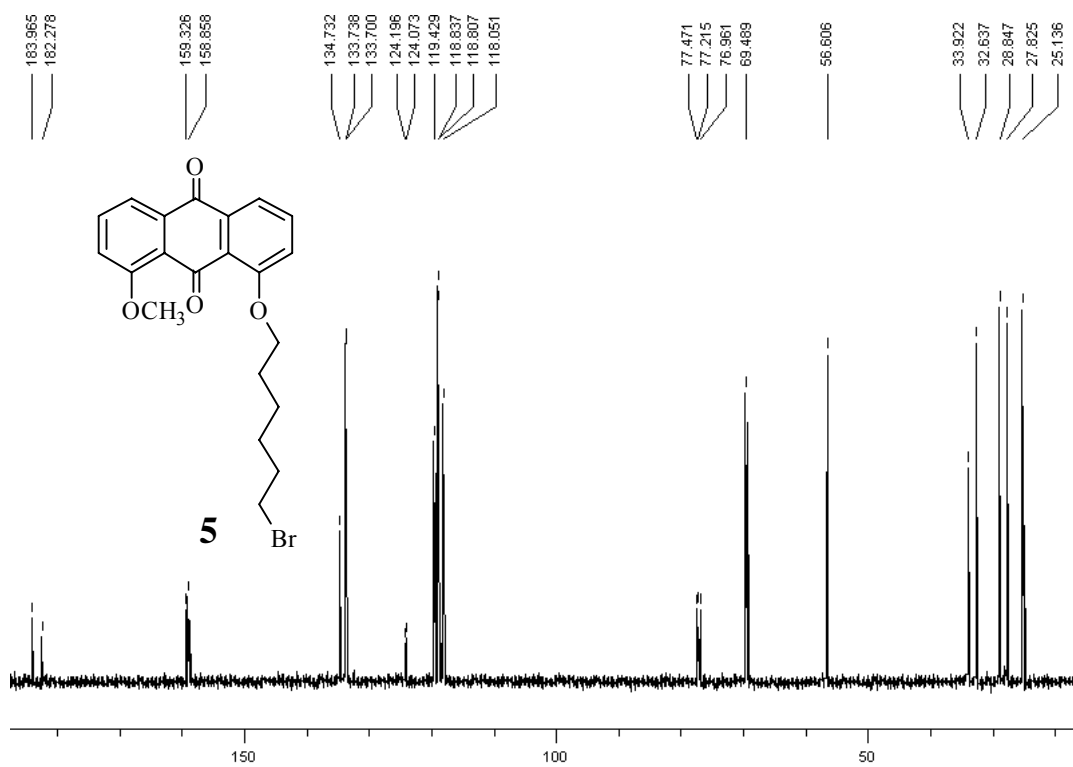

<sup>13</sup>C NMR (300 MHz, CDCl<sub>3</sub>) spectrum of **5**.

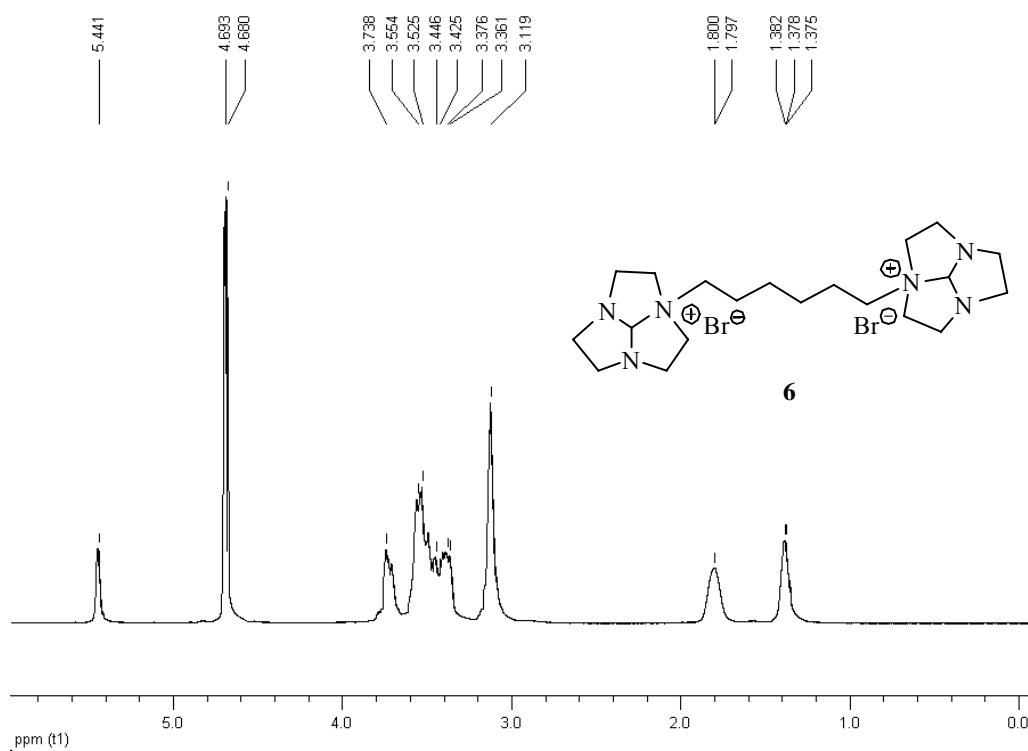

<sup>1</sup>H NMR (300 MHz, D<sub>2</sub>O) spectrum of **6**.

## Supplementary Information

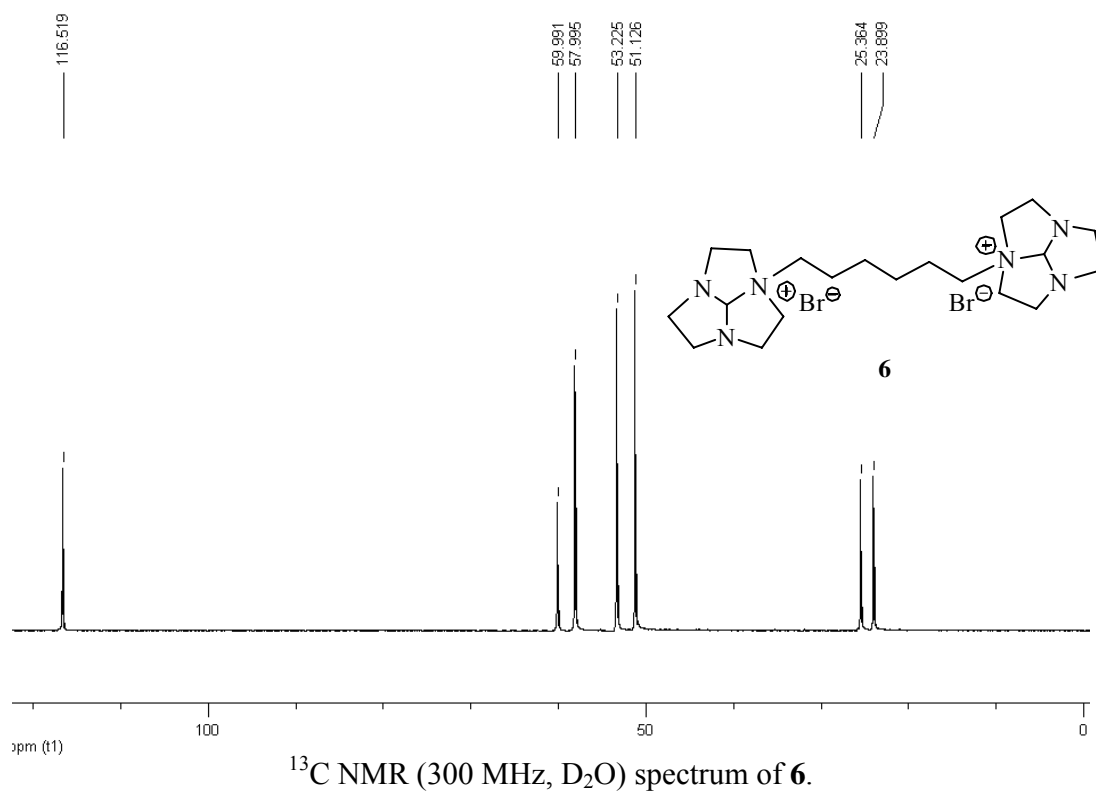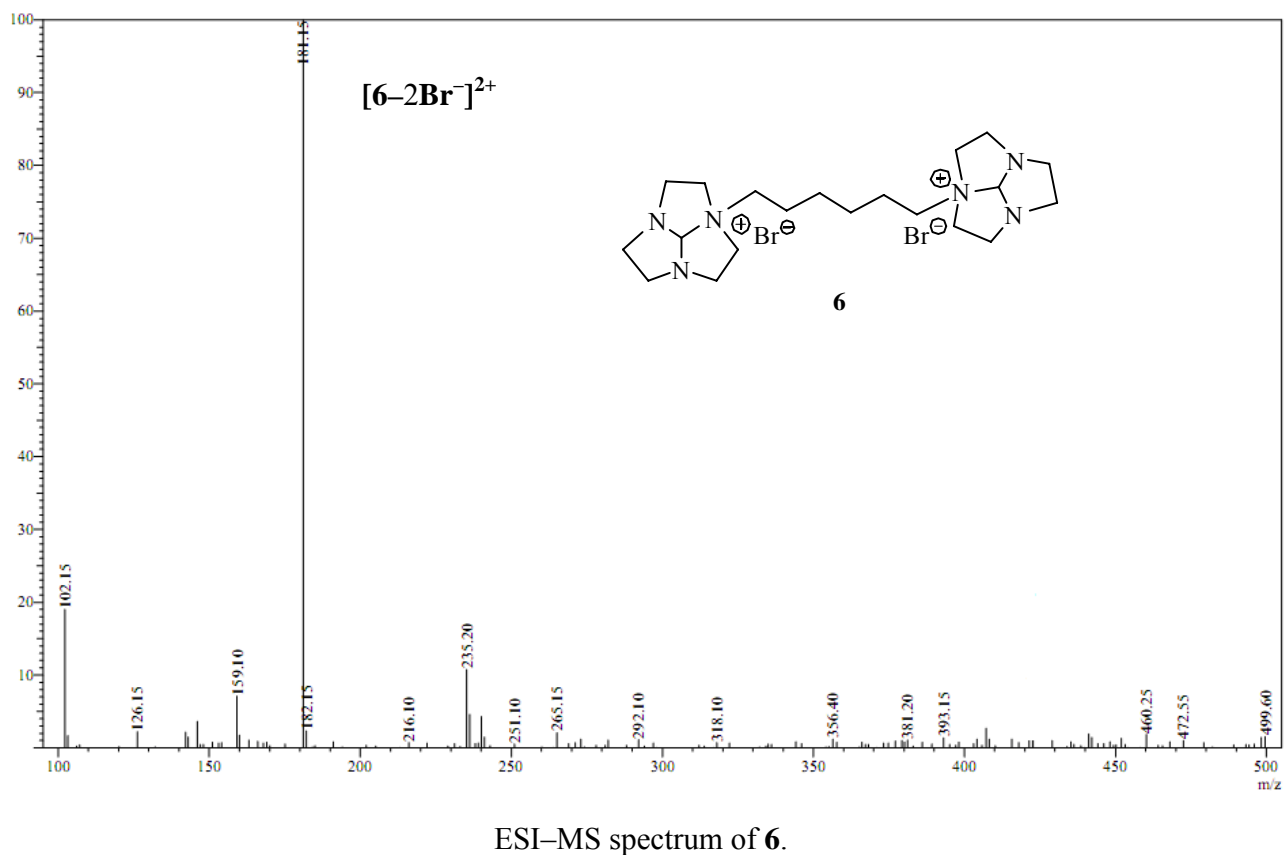



## Supplementary Information

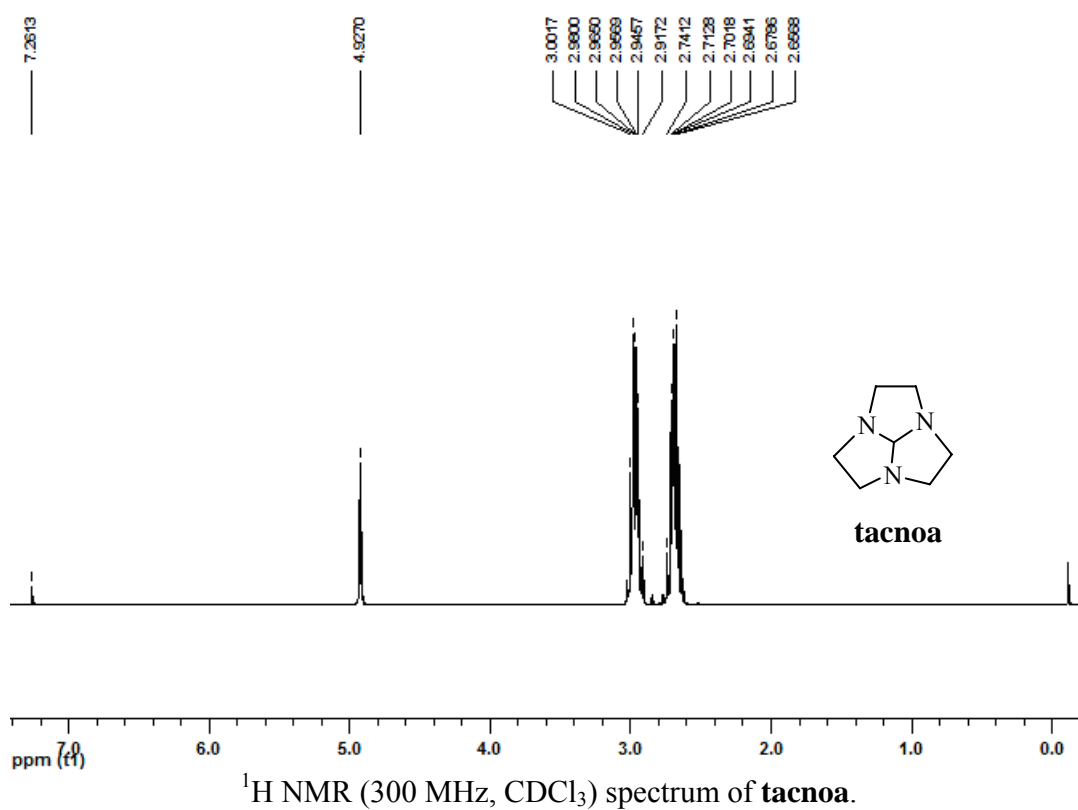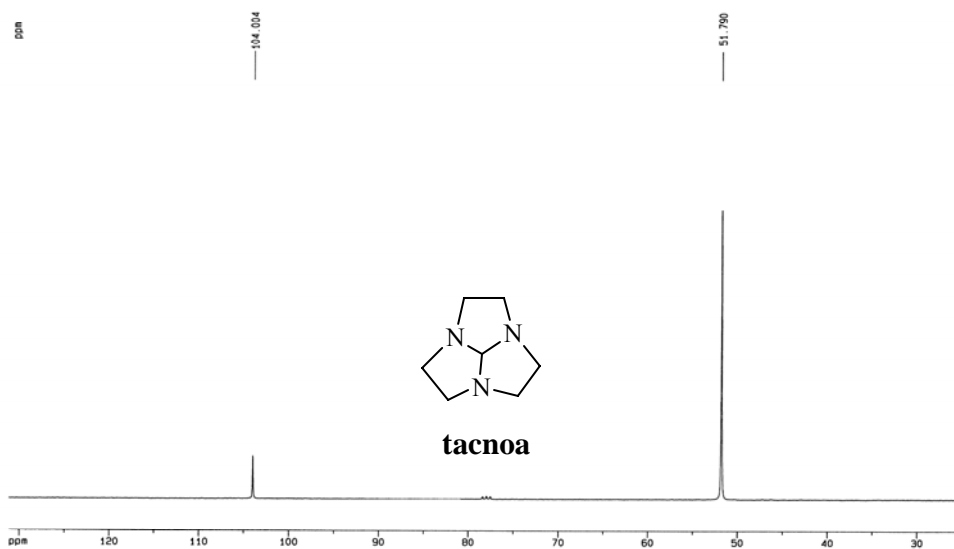

*Supplementary Information*

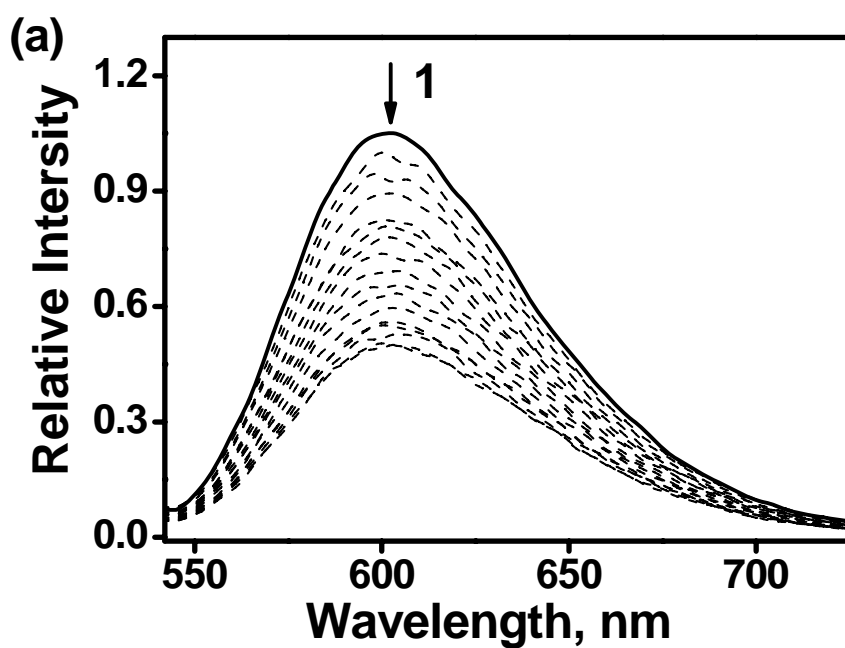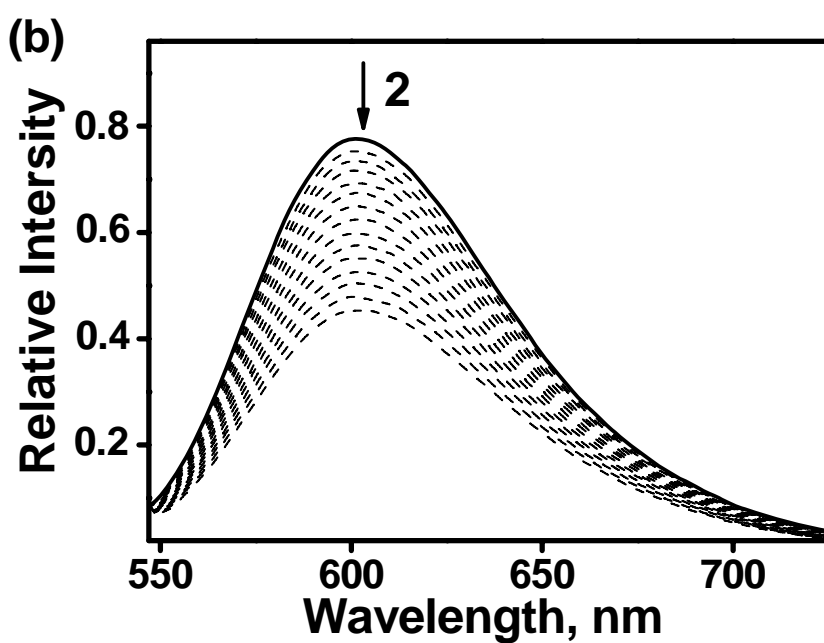

*Supplementary Information*

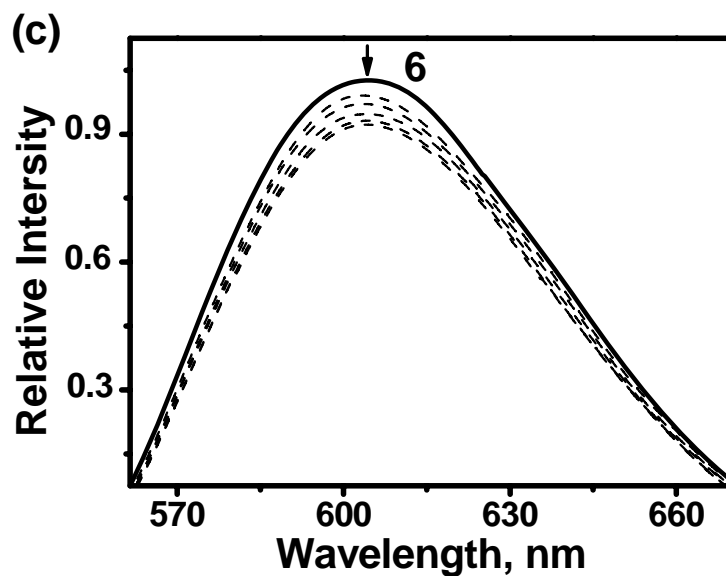

**Figure S1.** Emission spectra of EB bound to DNA in the absence (—) and presence (---) of (a) **1** ( $r = 0, 0.05, 0.10, 0.15, 0.21, 0.26, 0.36, 0.41, 0.46, 0.51, 0.56, 0.62, 0.67, 0.72, 0.77, 0.82, 0.92$ ), (b) **2** ( $r = 0, 0.04, 0.07, 0.10, 0.15, 0.19, 0.25, 0.31, 0.37, 0.44, 0.51, 0.60, 0.68, 0.78, 0.89$ ), (c) **6** ( $r = 0, 0.3, 0.5, 0.7, 0.85, 0.95$ ), from top to bottom. ( $r = [\text{compound}] / [\text{CT-DNA}]$ ;  $[\text{CT-DNA}] = 39 \mu\text{M}$ ;  $[\text{EB}] = 3.9 \mu\text{M}$ ;  $\lambda_{\text{ex}} = 530 \text{ nm}$ )

## Supplementary Information

### pH dependence

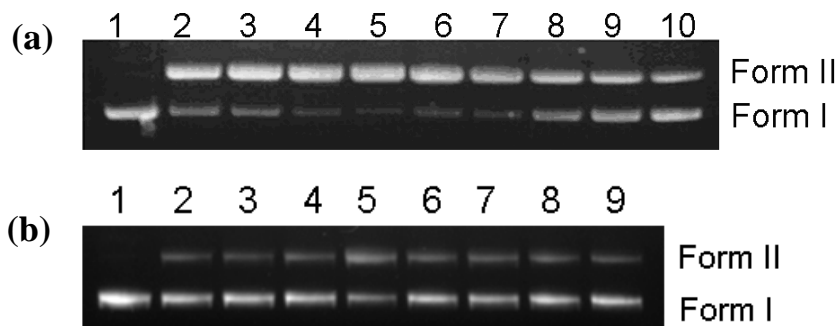

**Figure S2.** Agarose gel (1%) of pUC19 DNA (0.025 mM bp) incubated at 37 °C for 16 h with 0.033 mM (a) **1** and (b) **2** in buffer of different pH values (50 mM Tris-HCl). Lane 1, DNA control; (a) Lanes 2-10, pH 6.0, 6.50, 6.75, 7.25, 7.75, 8.00, 8.25, 8.50 and 9.00; (b) Lanes 2-9, pH 6.0, 6.50, 6.75, 7.25, 7.75, 8.0, 8.5 and 9.00, respectively.

### DNA cleavage by compound **3** alone (control assays)

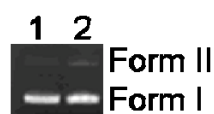

**Figure S3.** Agarose gel (1%) of pUC19 DNA (0.025 mM bp) incubated at 37°C for 16 h in the presence of 1,8-Bis(6-bromohexyloxy)anthraquinone (**3**) (0.027 mM). Lane 1, DNA control; Lane 2, 0.027 mM **3**.

**Table S1.** Analysis of DNA cleavage in the presence of **3**<sup>a</sup>

| compound    | DNA %  |         |
|-------------|--------|---------|
|             | Form I | Form II |
| DNA control | 96.79  | 3.21    |
| <b>3</b>    | 95.22  | 4.78    |

<sup>a</sup>Cleavage reactions were carried out in DMF - pH 7.25 Tris-HCl buffer (*V:V* = 2:5) for 16 h at 37 °C.

## Supplementary Information

### Ionic strength dependence

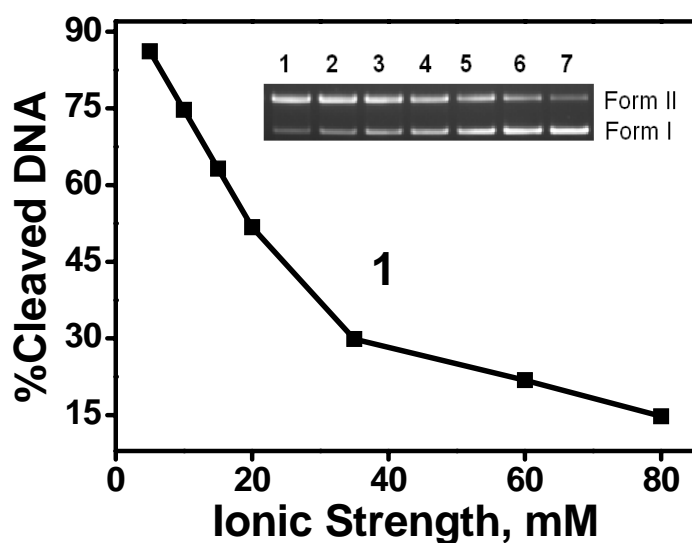

**Figure S4.** Ionic strength-dependent profile for DNA cleavage promoted by compound **1** (0.033 mM). The inset shows agarose gel (1%) of the DNA cleavage reaction products promoted by compound **1** (0.033 mM) for 16 h at 37 °C and pH 7.25 (50 mM Tris-HCl) under different ionic strength conditions: lanes 1-7, ionic strength of 5, 10, 15, 20, 35, 60 and 80 mM, respectively.

### Concentration dependence

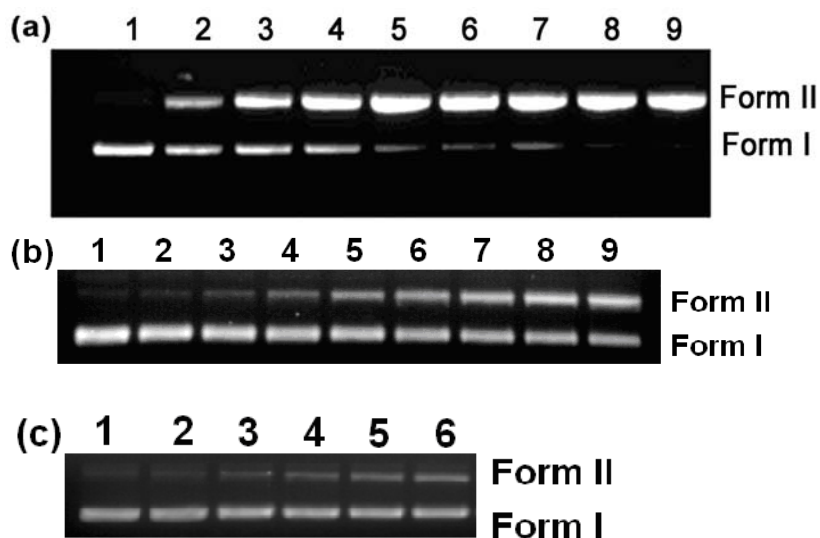

### Supplementary Information

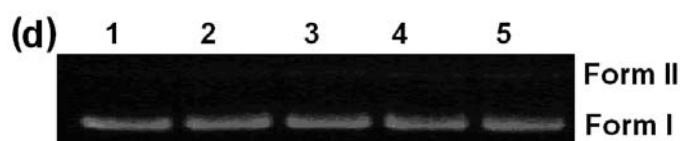

**Figure S5.** Agarose gel (1%) of pUC19 DNA (0.025 mM bp) incubated for 16.0 h at 37 °C with different concentrations of (a) **1** (b) **2** (c) **6** (d) tacnoa in pH 7.25 buffer (50 mM Tris-HCl / 5 mM NaCl). (a) Lanes 1 - 9, 0, 0.0006, 0.002, 0.006, 0.013, 0.027, 0.040, 0.053, 0.067 mM **1**, respectively; (b) Lanes 1 - 9, 0, 0.0006, 0.002, 0.006, 0.013, 0.027, 0.040, 0.053, 0.067 mM **2**, respectively; (c) Lanes 1 - 6, 0, 0.006, 0.027, 0.034, 0.053 and 0.067 mM **6**, respectively. (d) Lanes 1 - 5, 0, 0.025, 0.034, 0.053 and 0.067 mM tacnoa, respectively.

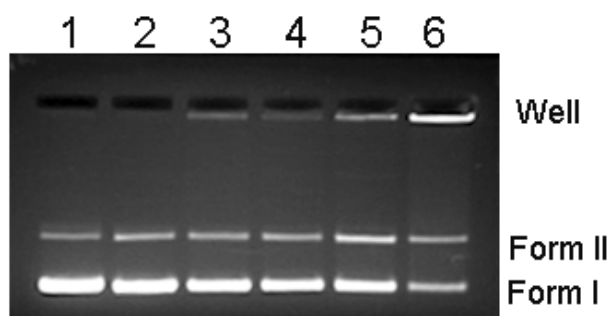

**Figure S6.** Agarose gel (1%) of pUC19 DNA (0.025 mM bp) incubated for 1.5 h at 20°C in pH 7.25 buffer (50 mM Tris-HCl / 5 mM NaCl) with different concentrations of **1**. Lanes 1 - 6, 0, 0.050, 0.067, 0.133, 0.267 and 0.400 mM **1**, respectively.

### Supplementary Information

#### Kinetics data

**Table S2.** Apparent initial first-order rate constants of DNA cleavage at various concentrations of compounds **1**, **2** and **6**. The reactions were carried out at 37 °C in 50 mM Tris-HCl/ 5 mM NaCl buffer (pH 7.25).

|   | <b>1</b>        |                                | <b>2</b>        |                                | <b>6</b>        |                                |
|---|-----------------|--------------------------------|-----------------|--------------------------------|-----------------|--------------------------------|
|   | [ <b>1</b> ]/mM | $k_{\text{obs}}/\text{h}^{-1}$ | [ <b>2</b> ]/mM | $k_{\text{obs}}/\text{h}^{-1}$ | [ <b>6</b> ]/mM | $k_{\text{obs}}/\text{h}^{-1}$ |
| 1 | 0.002           | 0.031±0.0012                   | 0.006           | 0.021 ± 0.0016                 | 0.012           | 0.015 ± 0.0009                 |
| 2 | 0.006           | 0.064±0.0020                   | 0.012           | 0.031 ± 0.0012                 | 0.027           | 0.029± 0.0013                  |
| 3 | 0.012           | 0.102±0.0021                   | 0.027           | 0.050 ± 0.0024                 | 0.033           | 0.035± 0.0021                  |
| 4 | 0.027           | 0.170±0.0083                   | 0.033           | 0.058 ± 0.0022                 | 0.053           | 0.040± 0.0007                  |
| 5 | 0.033           | 0.183±0.0105                   | 0.053           | 0.062 ± 0.0024                 |                 |                                |
| 6 | 0.040           | 0.195±0.0122                   |                 |                                |                 |                                |
| 7 | 0.053           | 0.213± 0.0055                  |                 |                                |                 |                                |

### Supplementary Information

Time course of pUC19 DNA (0.025 mM bp) cleavage promoted by **1** (0.053mM). The reaction was carried out at 37 °C in 50 mM Tris-HCl / 5 mM NaCl buffer (pH 7.25).

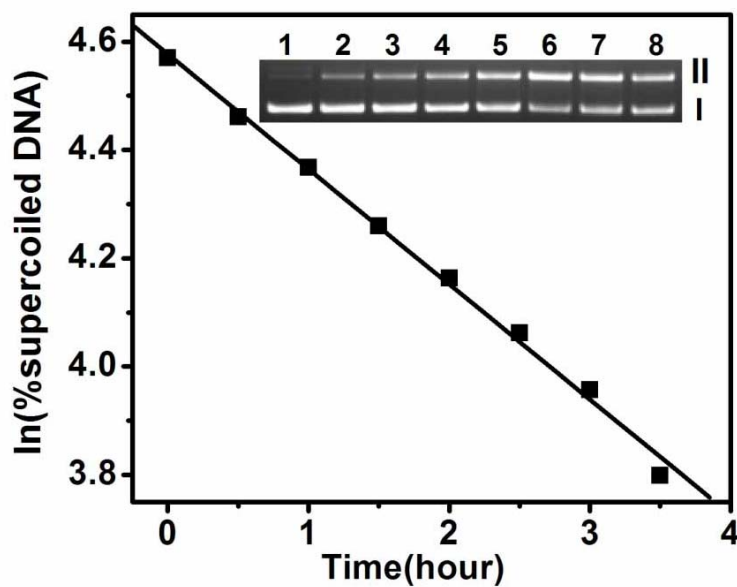

| Lane | Time/h | Ln (% Form I) | % DNA  |         |
|------|--------|---------------|--------|---------|
|      |        |               | Form I | Form II |
| 1    | 0.00   | 4.57          | 96.53  | 3.47    |
| 2    | 0.50   | 4.46          | 86.56  | 13.44   |
| 3    | 1.00   | 4.37          | 78.85  | 21.15   |
| 4    | 1.50   | 4.26          | 70.81  | 29.19   |
| 5    | 2.00   | 4.16          | 64.28  | 35.72   |
| 6    | 2.50   | 4.06          | 44.67  | 55.33   |
| 7    | 3.00   | 3.96          | 52.34  | 47.66   |
| 8    | 3.50   | 3.80          | 58.08  | 41.92   |



### Supplementary Information

Time course of pUC19 DNA (0.025 mM bp) cleavage promoted by **1** (0.040mM). The reaction was carried out at 37 °C in 50 mM Tris-HCl / 5 mM NaCl buffer (pH 7.25).

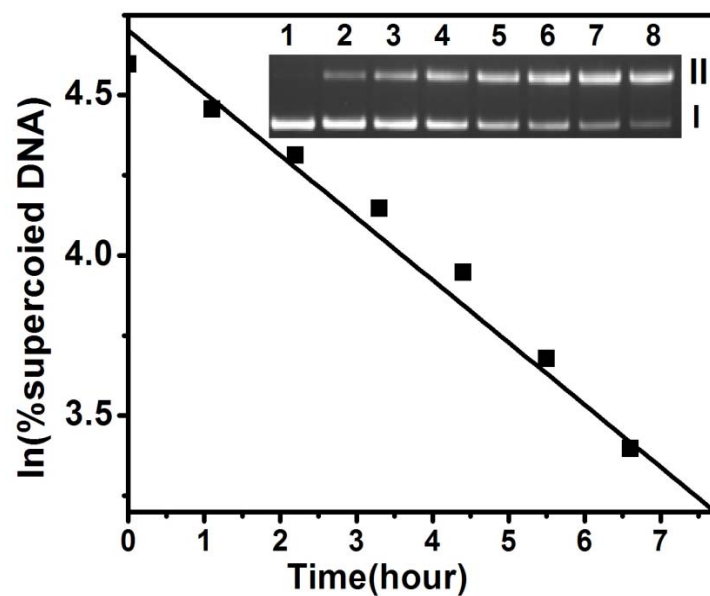

| Lane | Time/h | Ln (% Form I) | % DNA  |         |
|------|--------|---------------|--------|---------|
|      |        |               | Form I | Form II |
| 1    | 0      | 4.60          | 99.14  | 0.86    |
| 2    | 1.1    | 4.46          | 86.17  | 13.83   |
| 3    | 2.2    | 4.31          | 74.72  | 25.28   |
| 4    | 3.3    | 4.15          | 63.21  | 36.79   |
| 5    | 4.4    | 3.95          | 51.76  | 48.24   |
| 6    | 5.5    | 3.68          | 39.58  | 60.42   |
| 7    | 6.6    | 3.40          | 29.88  | 70.12   |
| 8    | 7.7    | 3.08          | 21.86  | 78.14   |

### Supplementary Information

Time course of pUC19 DNA (0.025 mM bp) cleavage promoted by **1** (0.033mM). The reactions were carried out at 37 °C in 50 mM Tris-HCl / 5 mM NaCl buffer (pH 7.25).

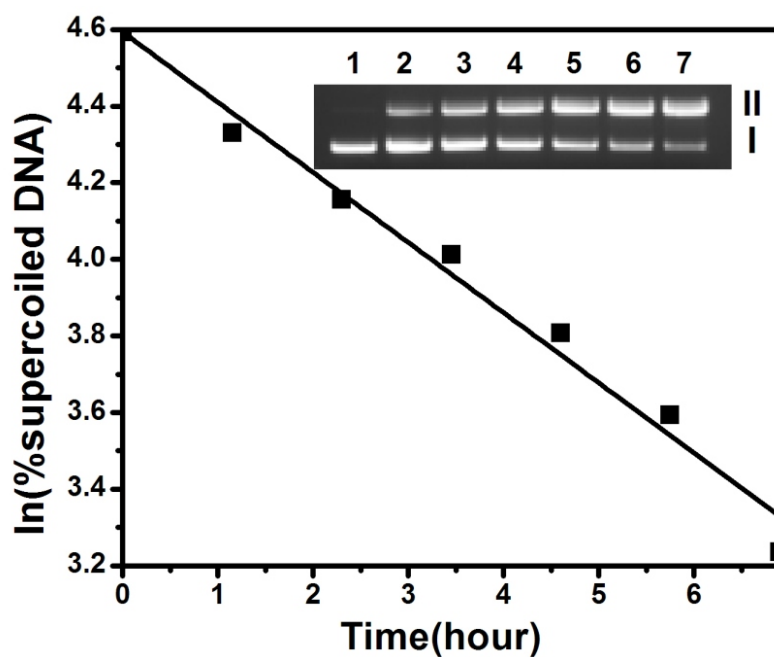

| Lane | Time/h | Ln (% Form I) | % DNA  |         |
|------|--------|---------------|--------|---------|
|      |        |               | Form I | Form II |
| 1    | 0.00   | 4.59          | 98.87  | 1.13    |
| 2    | 1.15   | 4.33          | 76.03  | 23.97   |
| 3    | 2.30   | 4.16          | 63.86  | 36.14   |
| 4    | 3.45   | 4.01          | 55.28  | 44.72   |
| 5    | 4.60   | 3.81          | 45.09  | 54.91   |
| 6    | 5.75   | 3.59          | 36.36  | 63.64   |
| 7    | 6.90   | 3.24          | 25.44  | 74.56   |

### Supplementary Information

Time course of pUC19 DNA (0.025 mM bp) cleavage promoted by **1** (0.027mM). The reaction was carried out at 37 °C in 50 mM Tris-HCl / 5 mM NaCl buffer (pH 7.25).

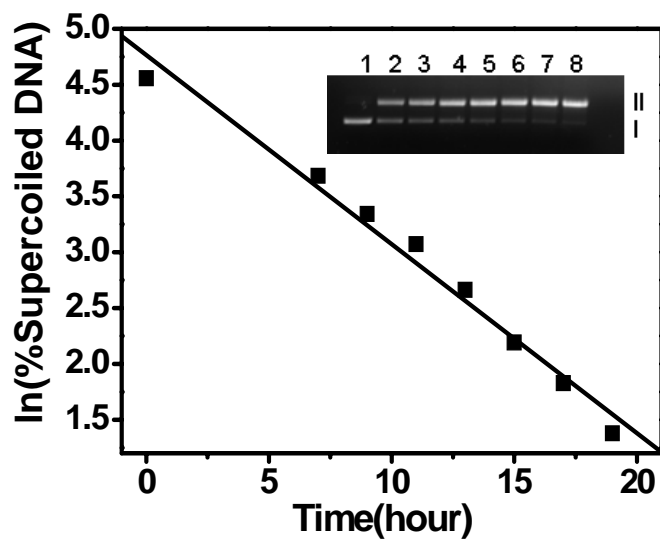

| Lane | Time/h | Ln (% Form I) | % DNA  |         |
|------|--------|---------------|--------|---------|
|      |        |               | Form I | Form II |
| 1    | 0.00   | 4.56          | 95.34  | 4.66    |
| 2    | 7.00   | 3.68          | 39.78  | 60.22   |
| 3    | 9.00   | 3.34          | 28.30  | 71.70   |
| 4    | 11.00  | 3.07          | 21.57  | 78.43   |
| 5    | 13.00  | 2.66          | 14.35  | 85.65   |
| 6    | 15.00  | 2.19          | 8.95   | 91.05   |
| 7    | 17.00  | 1.83          | 6.21   | 93.79   |
| 8    | 19.00  | 1.38          | 3.97   | 96.03   |

### Supplementary Information

Time course of pUC19 DNA (0.025 mM bp) cleavage promoted by **1** (0.012mM). The reaction was carried out at 37 °C in 50 mM Tris-HCl / 5 mM NaCl buffer (pH 7.25).

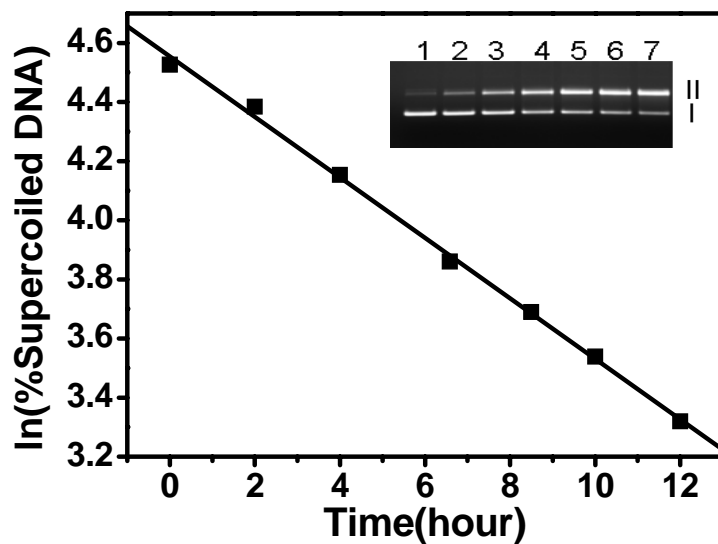

| Lane | Time/h | Ln (% Form I) | % DNA  |         |
|------|--------|---------------|--------|---------|
|      |        |               | Form I | Form II |
| 1    | 0.00   | 4.53          | 92.46  | 7.54    |
| 2    | 2.00   | 4.38          | 80.16  | 19.84   |
| 3    | 4.00   | 4.15          | 63.66  | 36.34   |
| 4    | 6.58   | 3.86          | 47.46  | 52.54   |
| 5    | 8.50   | 3.69          | 40.02  | 59.98   |
| 6    | 10.00  | 3.54          | 34.43  | 65.57   |
| 7    | 12.00  | 3.32          | 27.64  | 72.36   |

### Supplementary Information

Time course of pUC19 DNA (0.025 mM bp) cleavage promoted by **1** (0.006mM). The reaction was carried out at 37 °C in 50 mM Tris-HCl / 5 mM NaCl buffer (pH 7.25).

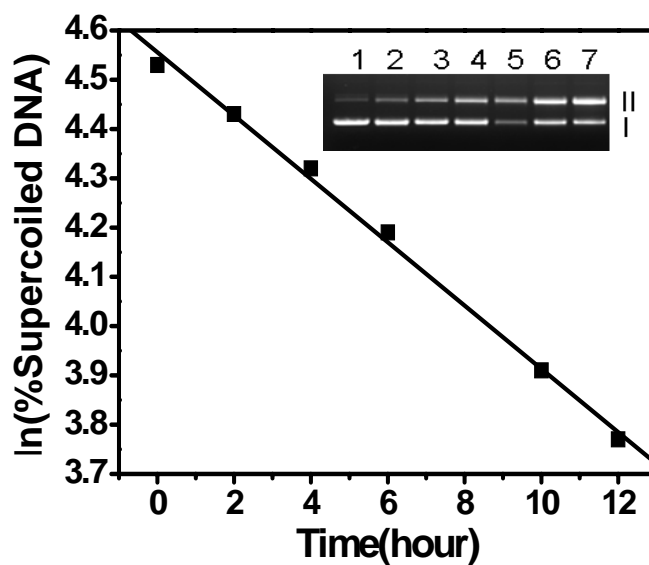

| Lane | Time/h | Ln (% Form I) | % DNA  |         |
|------|--------|---------------|--------|---------|
|      |        |               | Form I | Form II |
| 1    | 0.00   | 4.53          | 92.53  | 7.47    |
| 2    | 2.00   | 4.43          | 83.83  | 16.17   |
| 3    | 4.00   | 4.32          | 75.30  | 24.70   |
| 4    | 6.00   | 4.19          | 66.31  | 33.69   |
| 5    | 8.00   | 3.75          | 42.59  | 57.41   |
| 6    | 10.00  | 3.91          | 49.92  | 50.08   |
| 7    | 12.00  | 3.77          | 43.28  | 56.72   |

### Supplementary Information

Time course of pUC19 DNA (0.025 mM bp) cleavage promoted by **1** (0.002mM). The reaction was carried out at 37 °C in 50 mM Tris-HCl / 5 mM NaCl buffer (pH 7.25).

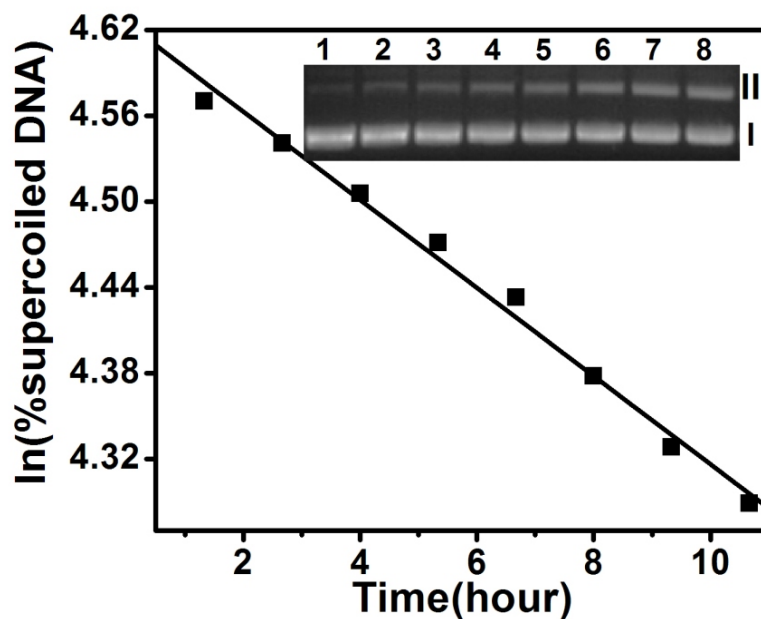

| Lane | Time/h | Ln (% Form I) | % DNA  |         |
|------|--------|---------------|--------|---------|
|      |        |               | Form I | Form II |
| 1    | 1.33   | 4.57          | 96.56  | 3.44    |
| 2    | 2.67   | 4.54          | 93.78  | 6.22    |
| 3    | 4.00   | 4.51          | 90.52  | 9.48    |
| 4    | 5.33   | 4.47          | 87.46  | 12.54   |
| 5    | 6.67   | 4.43          | 84.18  | 15.82   |
| 6    | 8.00   | 4.38          | 79.70  | 20.30   |
| 7    | 9.33   | 4.33          | 75.83  | 24.17   |
| 8    | 10.67  | 4.29          | 72.89  | 27.11   |

### Supplementary Information

Time course of pUC19 DNA (0.025 mM bp) cleavage promoted by **2** (0.053mM). The reaction was carried out at 37 °C in 50 mM Tris-HCl / 5 mM NaCl buffer (pH 7.25).

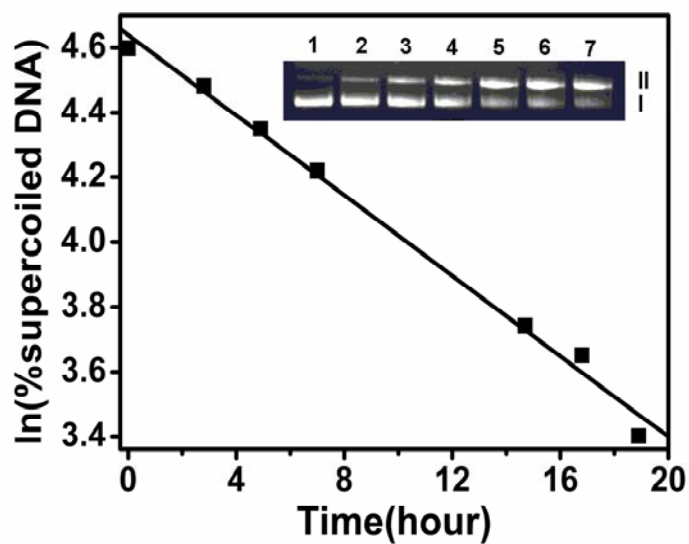

| Lane | Time/h | Ln (% Form I) | % DNA  |         |
|------|--------|---------------|--------|---------|
|      |        |               | Form I | Form II |
| 1    | 0      | 4.60          | 99.32  | 0.68    |
| 2    | 3      | 4.48          | 88.40  | 11.60   |
| 3    | 5      | 4.35          | 77.36  | 22.64   |
| 4    | 7      | 4.22          | 67.96  | 32.04   |
| 5    | 15     | 3.74          | 42.19  | 57.81   |
| 6    | 17     | 3.65          | 38.53  | 61.47   |
| 7    | 19     | 3.40          | 30.00  | 70.00   |

### Supplementary Information

Time course of pUC19 DNA (0.025 mM bp) cleavage promoted by **2** (0.033mM). The reaction was carried out at 37 °C in 50 mM Tris-HCl / 5 mM NaCl buffer (pH 7.25).

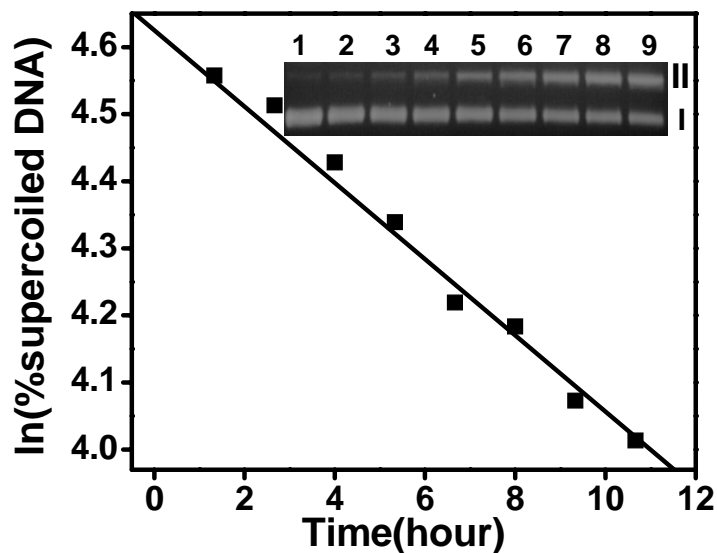

| Lane | Time/h | Ln (% Form I) | % DNA  |         |
|------|--------|---------------|--------|---------|
|      |        |               | Form I | Form II |
| 1    | 1.33   | 4.56          | 95.35  | 4.65    |
| 2    | 2.67   | 4.51          | 91.20  | 8.80    |
| 3    | 4.00   | 4.43          | 83.75  | 16.25   |
| 4    | 5.33   | 4.34          | 76.64  | 23.36   |
| 5    | 6.67   | 4.22          | 67.97  | 32.03   |
| 6    | 8.00   | 4.18          | 65.60  | 34.40   |
| 7    | 9.33   | 4.07          | 58.73  | 41.27   |
| 8    | 10.67  | 4.01          | 55.34  | 44.66   |



### Supplementary Information

Time course of pUC19 DNA (0.025 mM bp) cleavage promoted by **2** (0.027mM). The reaction was carried out at 37 °C in 50 mM Tris-HCl / 5 mM NaCl buffer (pH 7.25).

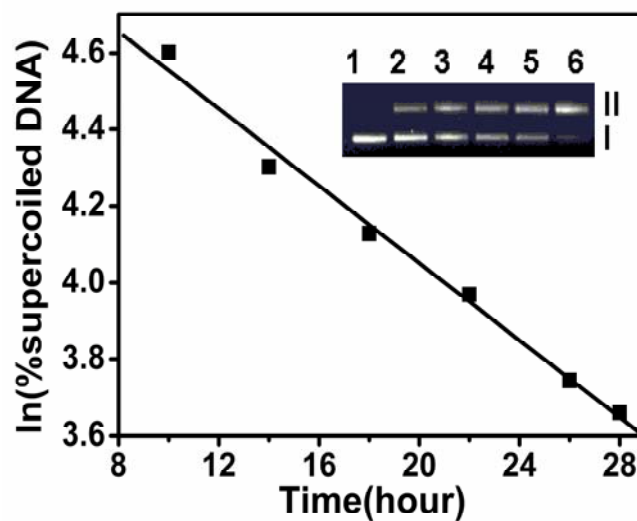

| Lane | Time/h | Ln (% Form I) | % DNA  |         |
|------|--------|---------------|--------|---------|
|      |        |               | Form I | Form II |
| 1    | 10     | 4.60          | 99.62  | 0.38    |
| 2    | 14     | 4.30          | 73.90  | 26.10   |
| 3    | 18     | 4.13          | 62.11  | 37.89   |
| 4    | 22     | 3.97          | 52.91  | 47.09   |
| 5    | 26     | 3.74          | 42.29  | 57.71   |
| 6    | 28     | 3.64          | 38.09  | 61.91   |

### Supplementary Information

Time course of pUC19 DNA (0.025 mM bp) cleavage promoted by **2** (0.012mM). The reaction was carried out at 37 °C in 50 mM Tris-HCl / 5 mM NaCl buffer (pH 7.25).

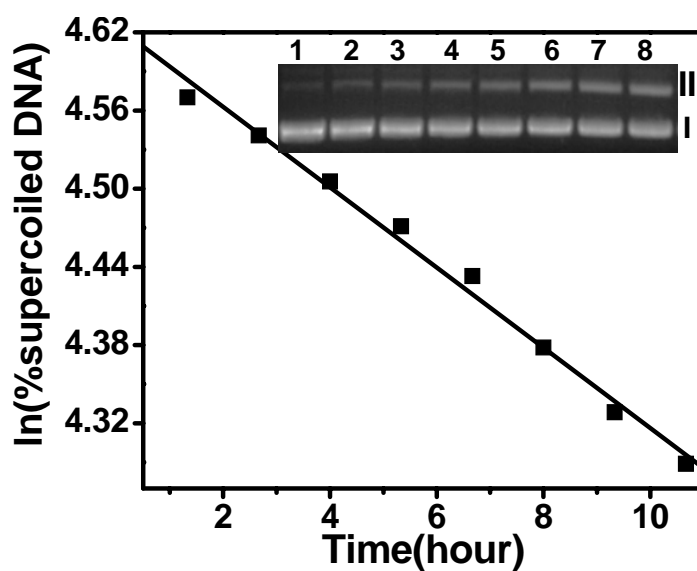

| Lane | Time/h | Ln (% Form I) | % DNA  |         |
|------|--------|---------------|--------|---------|
|      |        |               | Form I | Form II |
| 1    | 1.33   | 4.57          | 96.56  | 3.44    |
| 2    | 2.67   | 4.54          | 93.78  | 6.22    |
| 3    | 4      | 4.50          | 90.52  | 9.48    |
| 4    | 5.33   | 4.47          | 87.46  | 12.54   |
| 5    | 6.67   | 4.43          | 84.18  | 15.82   |
| 6    | 8      | 4.38          | 79.70  | 20.30   |
| 7    | 9.33   | 4.32          | 75.83  | 24.17   |
| 8    | 10.67  | 4.29          | 72.89  | 27.11   |

### Supplementary Information

Time course of pUC19 DNA (0.025 mM bp) cleavage promoted by **2** (0.006mM). The reaction was carried out at 37 °C in 50 mM Tris-HCl / 5 mM NaCl buffer (pH 7.25).

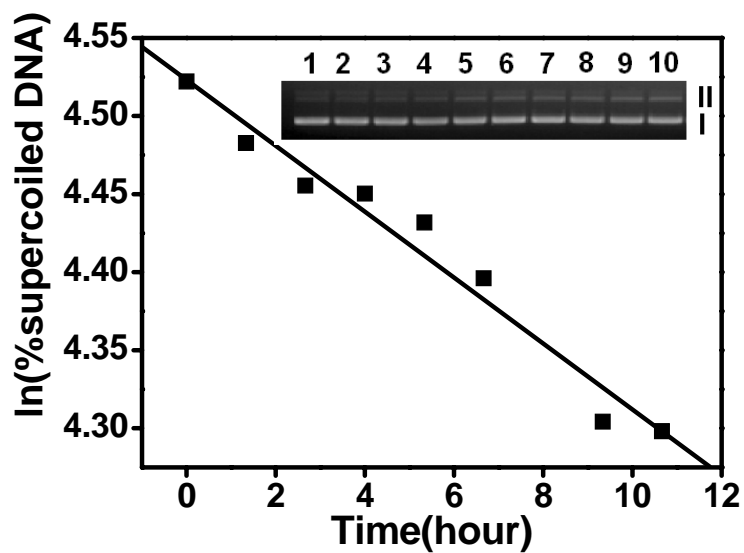

| Lane | Time/h | Ln (% Form I) | % DNA  |         |
|------|--------|---------------|--------|---------|
|      |        |               | Form I | Form II |
| 1    | 0.00   | 4.52          | 92.03  | 7.97    |
| 2    | 1.33   | 4.48          | 88.48  | 11.52   |
| 3    | 2.67   | 4.46          | 86.10  | 13.90   |
| 4    | 4.00   | 4.45          | 85.65  | 14.35   |
| 5    | 5.33   | 4.43          | 84.08  | 15.92   |
| 6    | 6.67   | 4.39          | 81.13  | 18.87   |
| 7    | 9.33   | 4.30          | 74.01  | 25.99   |
| 8    | 10.67  | 4.29          | 73.56  | 26.44   |

### Supplementary Information

Time course of pUC19 DNA (0.025 mM bp) cleavage promoted by **6** (0.053 mM). The reactions were carried out at 37 °C in 50 mM Tris-HCl / 5 mM NaCl buffer (pH 7.25).

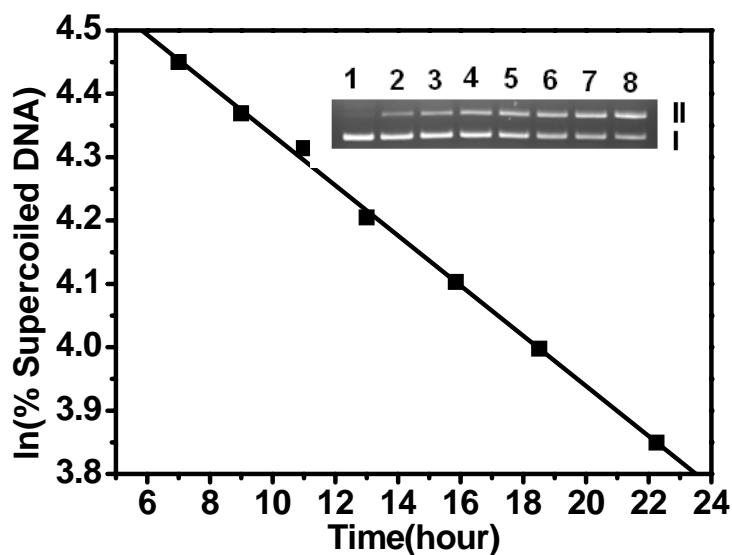

| Lane | Time (h) | Ln(% Form I) | % DNA  |         |
|------|----------|--------------|--------|---------|
|      |          |              | Form I | Form II |
| 1    | 0        | 4.58         | 98.24  | 1.76    |
| 2    | 7        | 4.45         | 85.65  | 14.35   |
| 3    | 9        | 4.36         | 78.98  | 21.02   |
| 4    | 11       | 4.31         | 74.74  | 25.26   |
| 5    | 13       | 4.20         | 67.01  | 32.99   |
| 6    | 16       | 4.10         | 60.53  | 39.47   |
| 7    | 18.5     | 3.99         | 54.47  | 45.53   |
| 8    | 22       | 3.85         | 46.98  | 53.02   |

### Supplementary Information

Time course of pUC 19 DNA (0.05 mM bp) cleavage promoted by **6** (0.033 mM). The reactions were carried out at 37 °C in 50 mM Tris-HCl/5 mM NaCl buffer (pH 7.25).

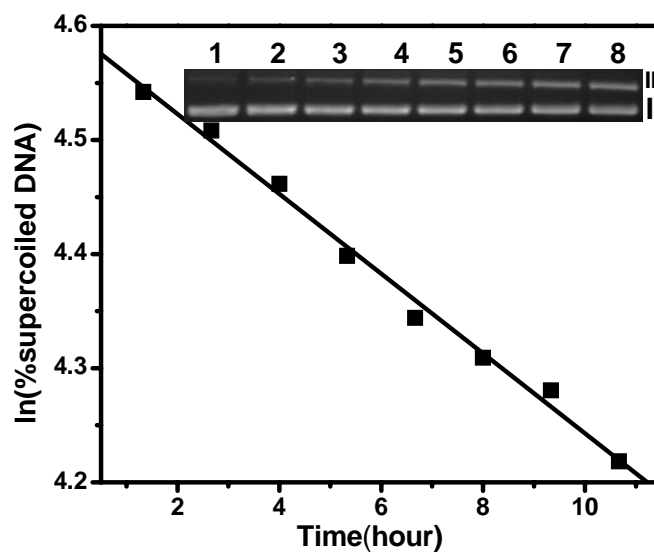

| Lane | Time (h) | Ln(% Form I) | % DNA  |         |
|------|----------|--------------|--------|---------|
|      |          |              | Form I | Form II |
| 1    | 1.33     | 4.54         | 93.89  | 6.11    |
| 2    | 2.67     | 4.51         | 90.77  | 9.23    |
| 3    | 4        | 4.46         | 86.63  | 13.37   |
| 4    | 5.33     | 4.40         | 81.33  | 18.67   |
| 5    | 6.67     | 4.34         | 77.02  | 22.98   |
| 6    | 8        | 4.31         | 74.38  | 25.62   |
| 7    | 9.33     | 4.28         | 72.28  | 27.72   |
| 8    | 10.67    | 4.22         | 67.92  | 32.08   |

### Supplementary Information

Time course of pUC 19 DNA (0.05 mM bp) cleavage promoted by **6** (0.027 mM). The reactions were carried out at 37 °C in 50 mM Tris-HCl/5 mM NaCl buffer (pH 7.25).

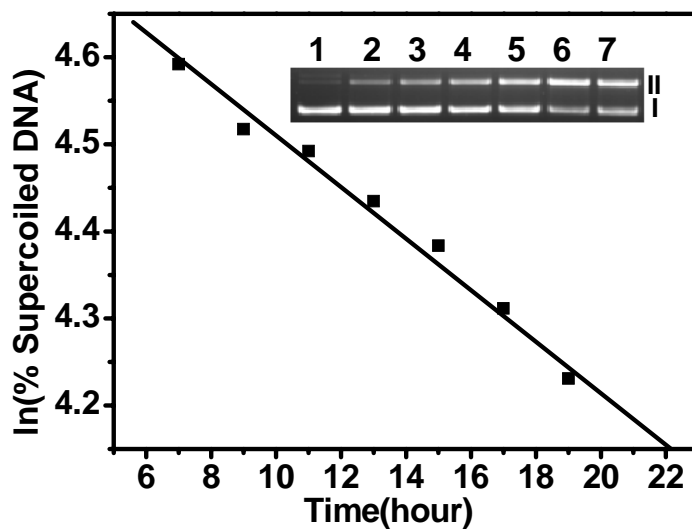

| Lane | Time (h) | Ln(% Form I) | % DNA  |         |
|------|----------|--------------|--------|---------|
|      |          |              | Form I | Form II |
| 1    | 7.00     | 4.59         | 98.69  | 1.31    |
| 2    | 9.00     | 4.51         | 91.59  | 8.41    |
| 3    | 11.00    | 4.49         | 89.32  | 10.68   |
| 4    | 13.00    | 4.43         | 84.33  | 15.67   |
| 5    | 15.00    | 4.38         | 80.12  | 19.88   |
| 6    | 17.00    | 4.31         | 74.55  | 25.45   |
| 7    | 19.00    | 4.231        | 68.77  | 31.23   |

### Supplementary Information

Time course of pUC 19 DNA (0.05 mM bp) cleavage promoted by **6** (0.012 mM). The reactions were carried out at 37 °C in 50 mM Tris-HCl/5 mM NaCl buffer (pH 7.25).

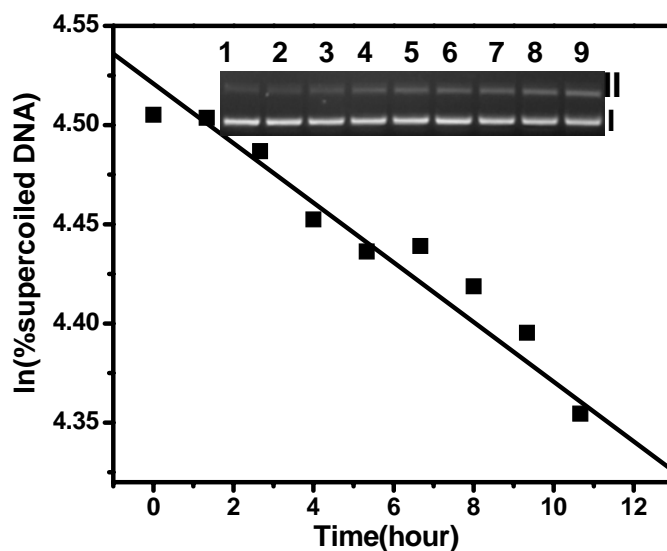

| Lane | Time (h) | Ln(% Form I) | % DNA  |         |
|------|----------|--------------|--------|---------|
|      |          |              | Form I | Form II |
| 1    | 0        | 4.51         | 91.29  | 8.71    |
| 2    | 1.33     | 4.50         | 90.34  | 9.66    |
| 3    | 2.67     | 4.49         | 88.84  | 11.16   |
| 4    | 4        | 4.45         | 85.84  | 14.16   |
| 5    | 5.33     | 4.44         | 84.46  | 15.54   |
| 6    | 6.67     | 4.43         | 83.69  | 15.31   |
| 7    | 8        | 4.42         | 82.99  | 17.01   |
| 8    | 9.33     | 4.40         | 81.07  | 18.93   |
| 9    | 10.67    | 4.35         | 77.83  | 22.17   |

### Supplementary Information

#### Radical scavengers' inhibition

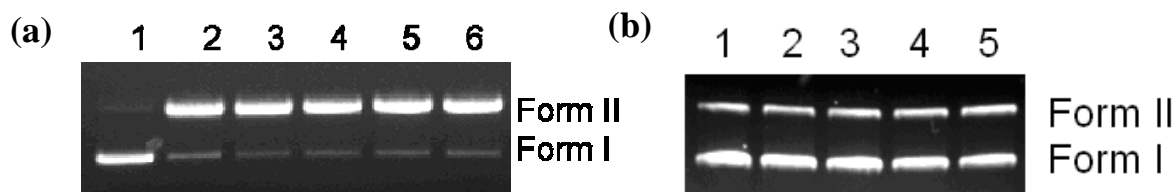

**Figure S7.** Agarose gel (1%) of pUC19 plasmid DNA (0.025 mM bp) cleaved by (a) **1** and (b) **2** (0.04 mM) in the presence of standard radical scavengers incubated for 16 h at 37 °C in pH 7.25 buffer (50 mM Tris–HCl / 5 mM NaCl). (a) Lane 1, DNA control; lane 2, no scavengers; lanes 3 - 6, in the presence of NaN<sub>3</sub>, DMSO, *t*-BuOH and KI, respectively; (b) Lane 1, no scavengers; lanes 2 - 5, in the presence of NaN<sub>3</sub>, DMSO, *t*-BuOH and KI, respectively.

**Table S3.** DNA cleavage promoted by **1** or **2** (0.04 mM) in the presence of standard radical scavengers.

|                  | % DNA    |         |          |         |
|------------------|----------|---------|----------|---------|
|                  | <b>1</b> |         | <b>2</b> |         |
|                  | Form I   | Form II | Form I   | Form II |
| DNA control      | 96.86    | 3.14    | 96.86    | 3.14    |
| Compound only    | 8.79     | 91.21   | 58.54    | 41.46   |
| NaN <sub>3</sub> | 4.81     | 95.19   | 60.64    | 39.36   |
| DMSO             | 5.89     | 94.11   | 62.87    | 39.13   |
| <i>t</i> -BuOH   | 6.20     | 93.80   | 61.97    | 38.03   |
| KI               | 7.11     | 92.89   | 62.58    | 37.42   |

#### DNA cleavage in the presence of Nucleosides monophosphates or BDNPP

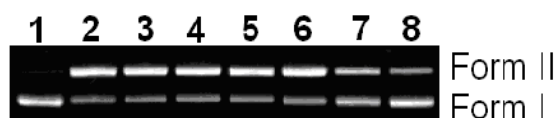

**Figure S8.** Agarose gel (1%) of pUC 19 DNA (0.05 mM bp) cleavage promoted by 0.05 mM **1** (incubated for 10 h at 37 °C in pH 7.25 (50 mM Tris-HCl)). Lane 1, DNA control; Lane 2, DNA + **1**; Lane 3, DNA + **1** + 0.05 mM adenosine; Lane 4, DNA + **1** + 0.05 mM uridine; Lane 5, DNA + **1** + 0.05 mM guanosine; Lane 6, DNA + **1** + 0.05 mM cytidine; Lane 7, DNA + **1** + 0.10 mM BDNPP; Lane 8, DNA + **1** + 0.20 mM BDNPP.



## Supplementary Information

### ESI-MS spectra of ApA

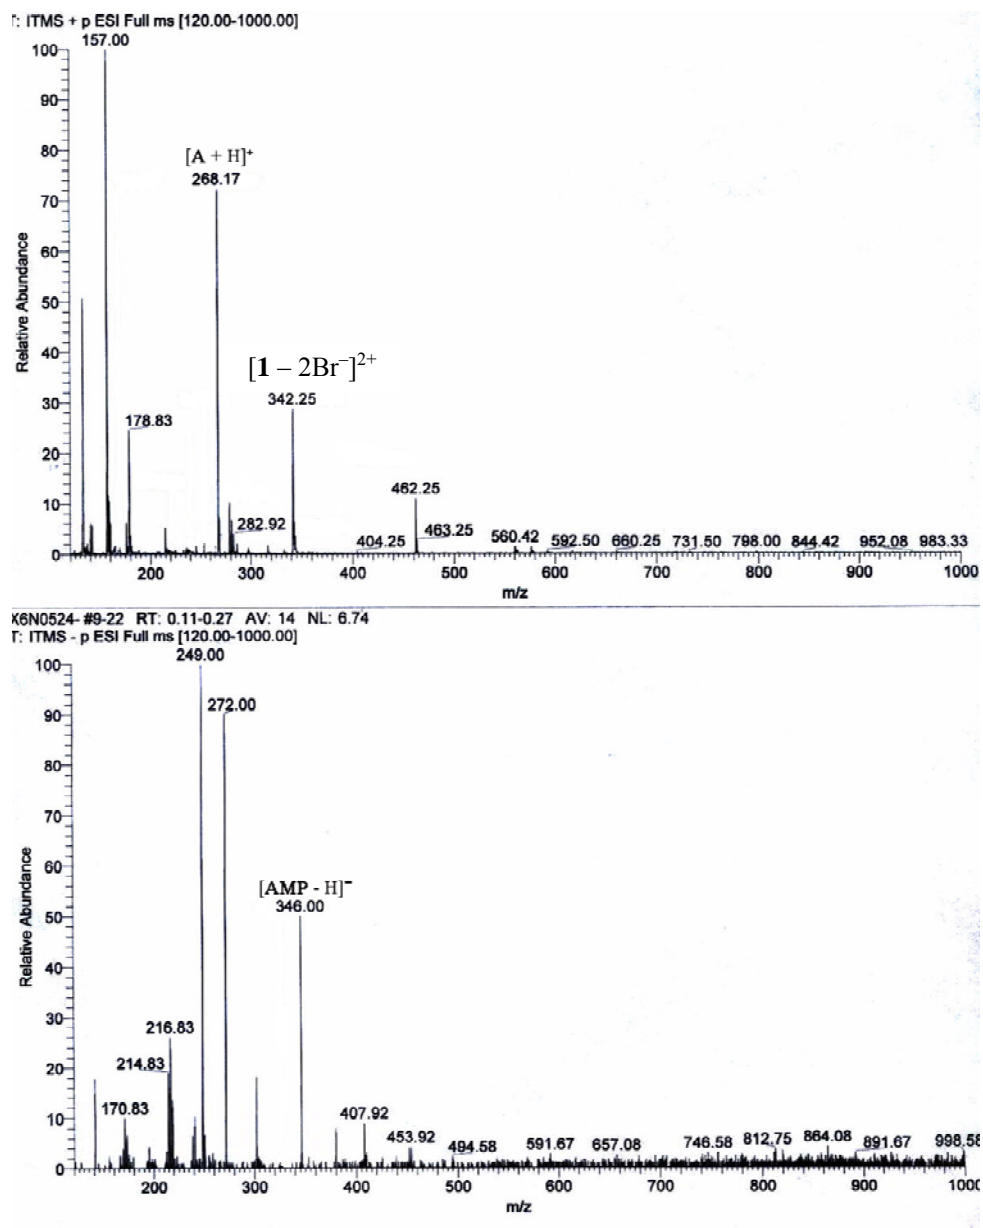

Figure S9(1). ESI-MS analysis of ApA after treatment with compound 1 and ApA for 16 h at 37 °C.

## Supplementary Information

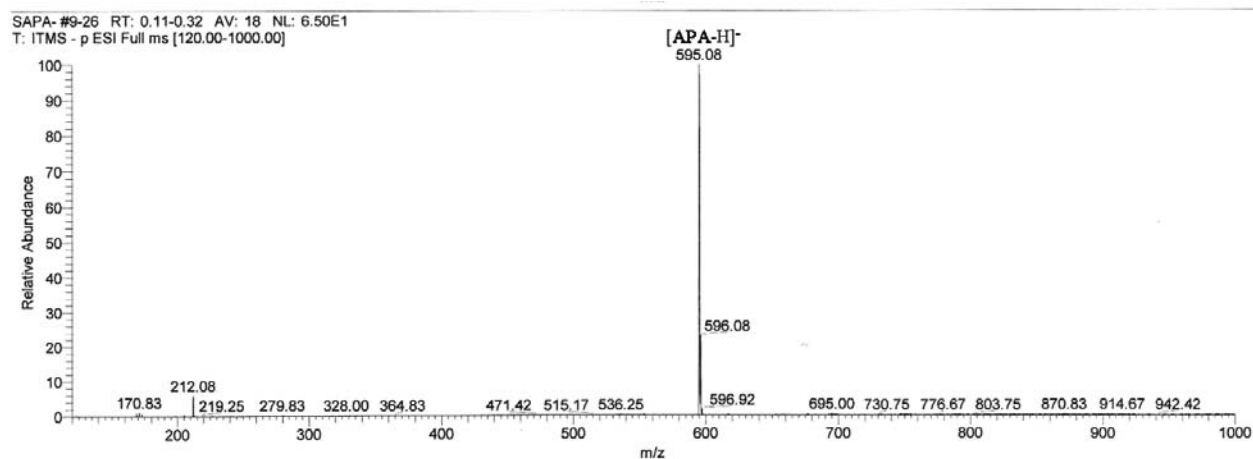

**Figure S9(2).** ESI-MS analysis of ApA alone incubated for 16 h at 37 °C.

## Supplementary Information

### ESI-MS spectra of reaction of BDNPP with compound 1

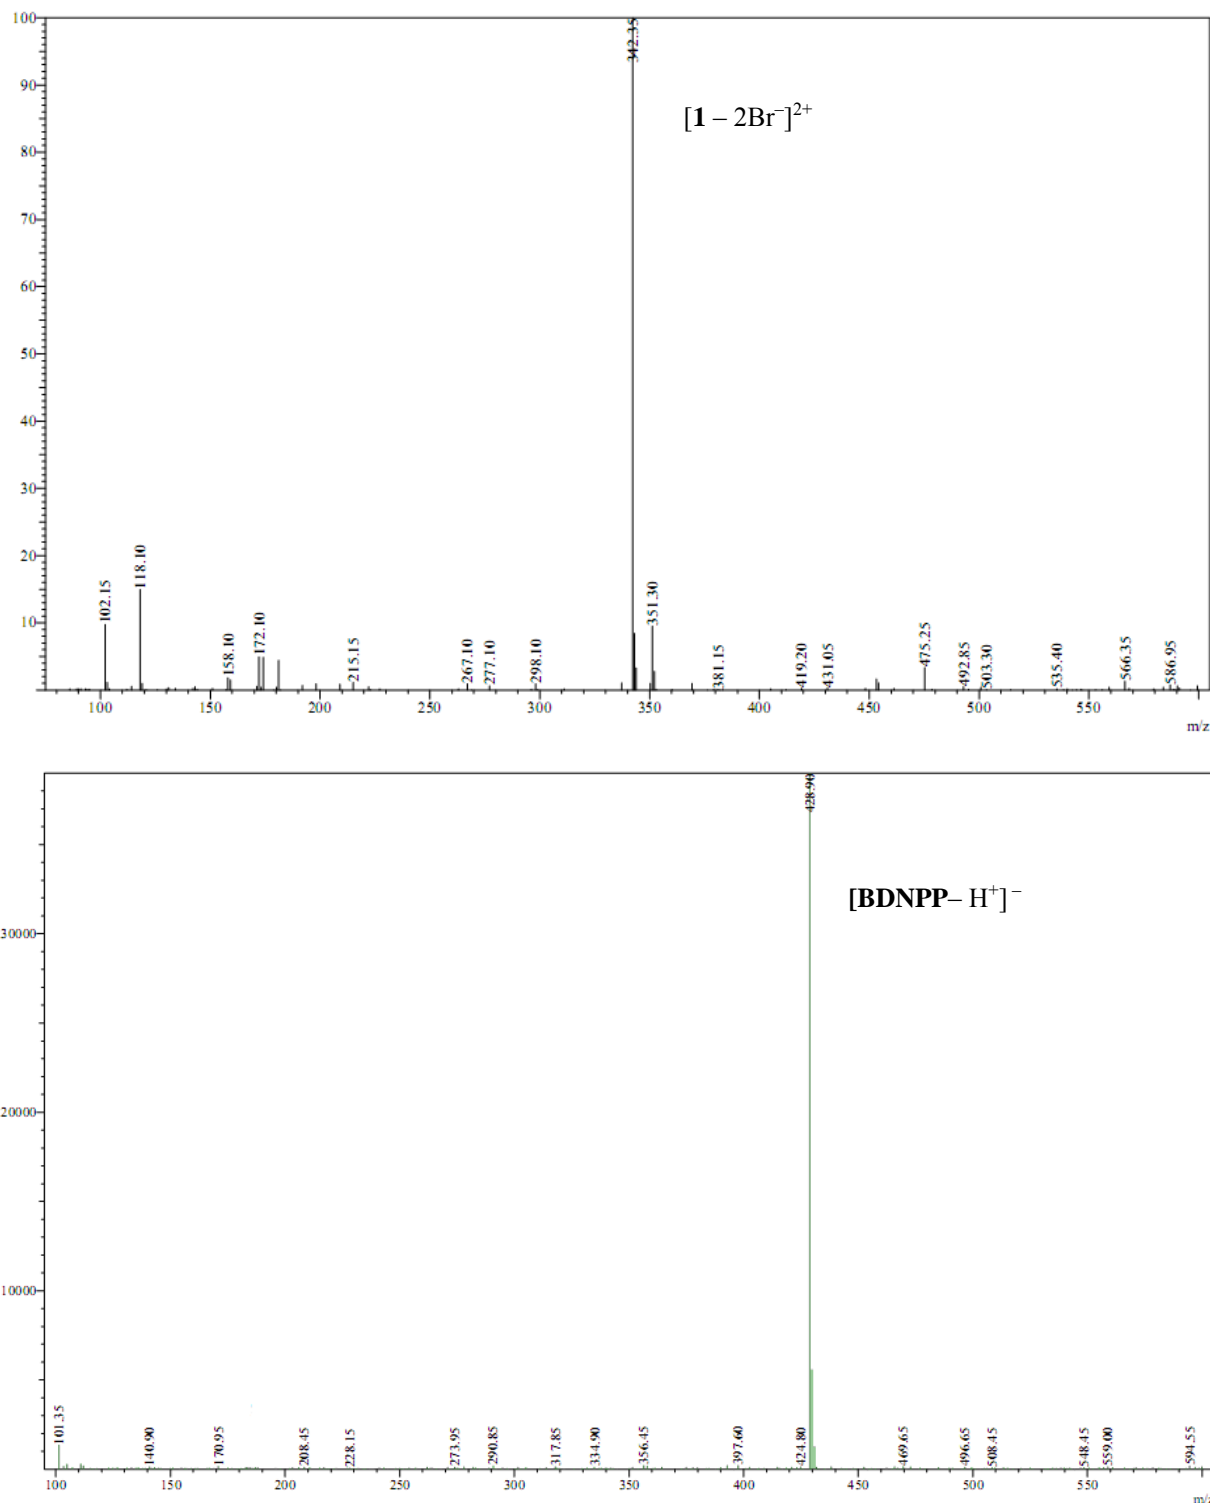

**Figure S10(1).** ESI-MS analysis of solution after treatment with compound 1 and BDNPP for 0 h at room temperature.

### Supplementary Information

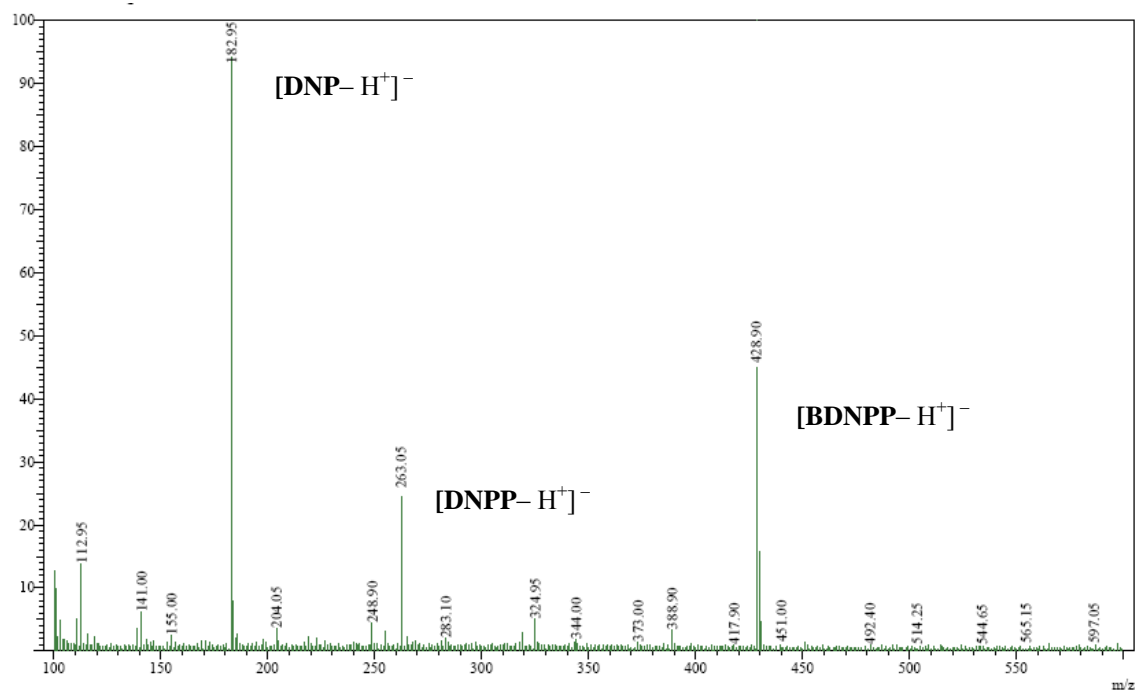

**Figure S10(2).** ESI-MS analysis of solution after treatment with compound **1** and BDNPP for 3 h at room temperature.

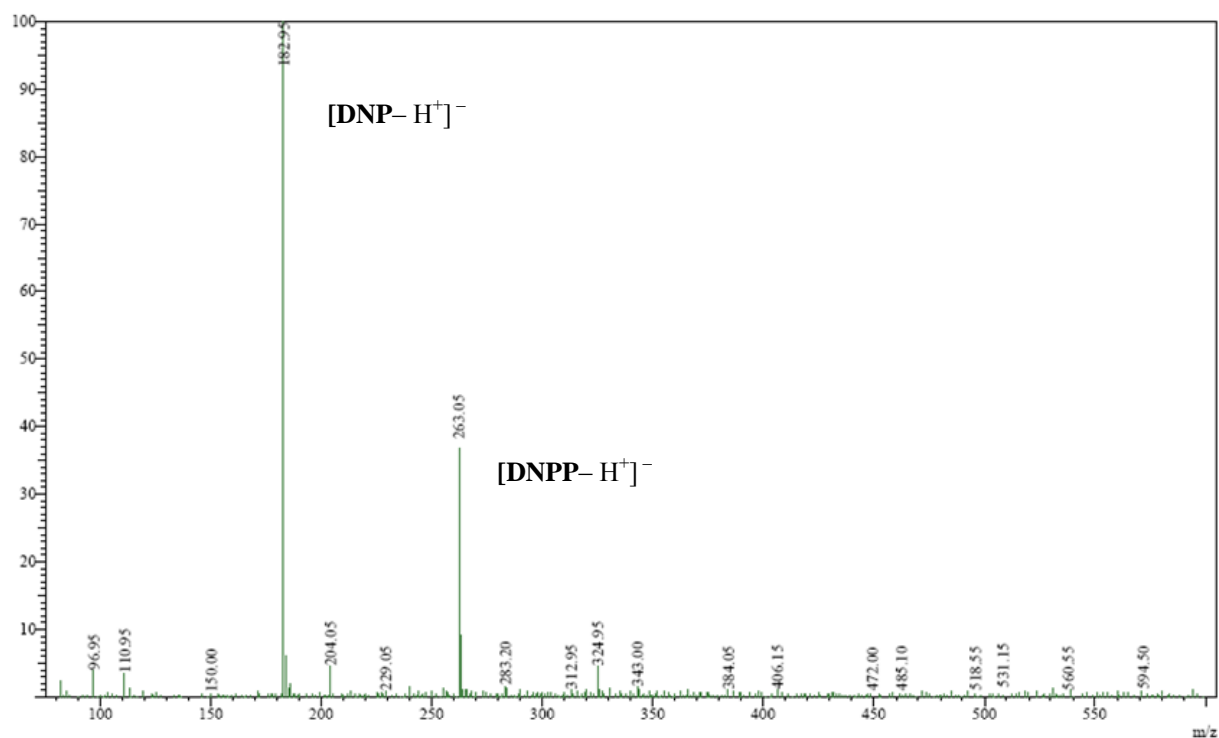

**Figure S10(3).** ESI-MS analysis of solution after treatment with compound **1** and BDNPP for 5 h at room temperature.

## Supplementary Information

### DNA cleavage in the presence of EDTA

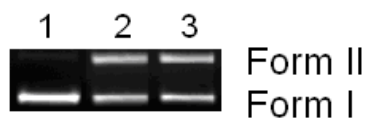

**Figure S11.** Agarose gel (1%) of pUC19 plasmid DNA (0.025 mM bp) cleaved by **1** (0.03 mM) in the absence or presence of EDTA (10 mM) incubated for 5 h at 37 °C in pH 7.25 buffer (50 mM Tris–HCl / 5 mM NaCl). Lane 1, DNA control; lane 2, only **1**; lane 3, **1** + EDTA.

**Table S4.** DNA cleavage promoted by **1** (0.030 mM) in the presence of 10 mM EDTA.

| Added compound  | DNA %  |         |
|-----------------|--------|---------|
|                 | Form I | Form II |
| DNA control     | 99.35  | 0.65    |
| <b>1</b> only   | 50.29  | 49.71   |
| <b>1</b> + EDTA | 49.70  | 50.30   |
